1                   **Ultrarare Variants in DNA Damage Repair Genes in Pediatric Acute-Onset**  
2                   **Neuropsychiatric Syndrome or Acute Behavioral Regression in Neurodevelopmental**  
3                   **Disorders**

4  
5 **Running title: DNA Damage Repair Genes in Acute Behavioral Regression**

6  
7 Janet L. Cunningham<sup>1</sup>, Jennifer Frankovich<sup>2</sup>, Robert A. Dubin<sup>3</sup>, Erika Pedrosa<sup>4</sup>, Refia Nur  
8 Baykara<sup>4</sup>, Noelle Cathleen Schlenk<sup>5</sup>, Shahina B. Maqbool<sup>6</sup>, Hedwig Dolstra<sup>4</sup>, Jacqueline  
9 Marino<sup>4</sup>, Jacob Edinger<sup>4</sup>, Julia M. Shea<sup>4</sup>, Gonzalo Laje<sup>7</sup>, Sigrid M.A. Swagemakers<sup>8</sup>, Siamala  
10 Sinnadurai<sup>8,9</sup>, Peter J. van der Spek<sup>8</sup>, Herbert M. Lachman<sup>10\*</sup>

11  
12 <sup>1</sup>Department of Medical Sciences, Psychiatry, Uppsala University, Uppsala, Sweden

13  
14 <sup>2</sup>Department of Pediatrics, Division of Pediatric Allergy, Immunology, Rheumatology and  
15 Immune Behavioral Health Program, Stanford Children's Health and Stanford University School  
16 of Medicine, Palo Alto, CA, USA

17 <sup>3</sup>Center for Epigenomics / Computational Genomics Core, Albert Einstein College of Medicine

18 <sup>4</sup>Department of Psychiatry and Behavioral Sciences, Albert Einstein College of Medicine.

19 <sup>5</sup>Stanford Children's Health, PANS Clinic and Research Program, Stanford University School of  
20 Medicine, Stanford, CA, USA.

21 <sup>6</sup>Department of Genetics Epigenetics Shared Facility, Albert Einstein College of Medicine

22 <sup>7</sup>Department of Psychiatry, Permian Basin, Texas Tech University Health Sciences Center  
23 School of Medicine

24 <sup>8</sup>Department of Pathology and Clinical Bioinformatics, Erasmus MC, Rotterdam, Netherlands

25 <sup>9</sup>Department of Epidemiology and Health Promotion at the School of Public Health  
26 Medical Center for Postgraduate Education, Warsaw, Poland

27 <sup>10</sup>Department of Psychiatry and Behavioral Sciences, Department of Medicine, Department of  
28 Genetics, Dominick P. Purpura Department of Neuroscience, Albert Einstein College of  
29 Medicine

31 \*corresponding author  
32 Dr. Herbert Lachman  
33 Albert Einstein College of Medicine  
34 Forchheimer 103  
35 1300 Morris Park Ave.  
36 Bronx, New York 10461  
37 Phone: 718-430-2428  
38 Email: Herb.Lachman@einsteinmed.edu  
39  
40

## 41 **Abstract**

42 Acute onset of severe psychiatric symptoms or regression may occur in children with premorbid  
43 neurodevelopmental disorders, although typically developing children can also be affected.  
44 Infections or other stressors are likely triggers. The underlying causes are unclear, but a current  
45 hypothesis suggests the convergence of genes that influence neuronal and immunological  
46 function. We previously identified 11 genes in Pediatric Acute-Onset Neuropsychiatry Syndrome  
47 (PANS), in which two classes of genes related to either synaptic function or the immune system  
48 were found. Among the latter, three affect the DNA damage response (DDR): *PPM1D*, *CHK2*,  
49 and *RAG1*. We now report an additional 16 cases with mutations in *PPM1D* and other DDR  
50 genes in patients with acute onset of psychiatric symptoms and/or regression that were  
51 classified by their clinicians as PANS or another inflammatory brain condition. The genes  
52 include clusters affecting p53 DNA repair (*PPM1D*, *ATM*, *ATR*, *53BP1*, and *RMRP*), and the  
53 Fanconi Anemia Complex (*FANCE*, *SLX4/FANCP*, *FANCA*, and *FANCI*). We hypothesize that  
54 defects in DNA repair genes, in the context of infection or other stressors, could lead to an  
55 increase in cytosolic DNA in immune cells triggering DNA sensors, such as cGAS-STING and  
56 AIM2 inflammasomes. These findings could lead to new treatment strategies.

57

## 58 **Introduction**

59 We recently reported the first whole exome and whole genome sequencing (WES and  
60 WGS, respectively) analysis in Pediatric Acute-Onset Neuropsychiatry Syndrome (PANS) in  
61 which ultrarare variants were found in 11 genes in 21 cases<sup>1</sup>. The genes harboring ultrarare  
62 variants (minor allele frequency <0.001) showed extensive heterogeneity but clustered to those  
63 that affect innate and adaptive immunity; *PPM1D* (3 cases), *NLRC4* (4 cases), *RAG1* (3 cases),  
64 *PLCG2*, and *CHK2*, or genes that affect synaptic function; *SGCE* (2 cases), *CACNA1B* (2  
65 cases), *SHANK3* (3 cases), and one case each for *GRIN2A*, *GABRG2*, and *SYNGAP1*. Of the  
66 21 subjects, five were diagnosed with autism spectrum disorder (ASD) before their deterioration  
67 that met PANS criteria. In addition to ASD, four cases were diagnosed with another  
68 neurodevelopmental disorder (NDD), one of whom had Jansen de Vries Syndrome (JdVS),  
69 which is caused by truncating mutations in *PPM1D* exons 5 or 6 that cause a gain-of-function  
70 effect by suppressing p53 and other proteins involved in the DNA damage repair response  
71 (DDR) (e.g., *MDM2*, *ATM*, *CHK1*, *CHK2*, *ATR*, and *H2AX*)<sup>2-6</sup>. The high prevalence of PANS  
72 superimposed on pre-existing NDD is consistent with the observations of other groups<sup>7, 8</sup>.

73 PANS is thought to be an inflammatory disorder that primarily affects the deep brain grey  
74 matter (primarily the basal ganglia but the thalamus and amygdala may be involved in more

75 extensive cases). This hypothesis is based on the cardinal symptoms of PANS and is supported  
76 by four neuroimaging studies showing the following: swelling of the basal ganglia during the  
77 acute stage, microglial activation in the caudate and globus pallidus, grey/white matter  
78 differences in the basal ganglia, and microstructural changes throughout the brain but most  
79 prominently in the basal ganglia<sup>9-12</sup>.

80 The clinical diagnosis PANS has core symptoms of abrupt onset obsessive-compulsive  
81 disorder (OCD) and/or restricted eating (food aversion), with two or more secondary symptoms:  
82 anxiety, emotional lability, irritability, rage, cognitive regression, sleep disturbance, sensory  
83 dysregulation, movement abnormalities, urinary symptoms including new onset dysuria or  
84 urinary frequency<sup>13</sup>. While the criteria require 2 secondary symptoms, most patients have 5 to 6  
85 secondary symptoms that start abruptly alongside the OCD and/or eating restriction. Autonomic  
86 instability (POTS, dilated pupils, increased urinary frequency, enuresis) and hypermobility have  
87 also been reported as co-morbid with PANS<sup>13-18</sup>. A deterioration in school performance occurs,  
88 exemplified by the loss of previously learned skills and/or new onset procedural learning  
89 challenges presumably relating to the basal ganglia inflammation PANS<sup>9-12, 19</sup>. Activities of daily  
90 living, extracurricular activities, and social interactions are severely affected during relapses.  
91 PANS can occur in children with or without premorbid ASD or other NDD.

92 For parents, the abrupt onset is a telling feature with a rapid decline in behavior and  
93 functioning that is sometimes, literally, overnight or emerging over a period of a week. The  
94 course is typically relapsing and remitting, but not all relapses are hyperacute/acute. Relapses  
95 are frequently associated with an infection and data in support of a neuroinflammatory etiology  
96 for PANS is accumulating. In the subgroup of cases following Streptococcus infections, a range  
97 of group A streptococcal (GAS) autoantibodies and antibodies to striatal cholinergic  
98 interneurons can be detected<sup>15, 20-22</sup>. Recently, an increased prevalence of folate receptor alpha  
99 autoantibodies associated with cerebral folate deficiency and ASD were detected in PANS<sup>23</sup>.  
100 Additionally, cross-sectional prevalence data show that approximately one-third of patients  
101 meeting PANS criteria eventually develop enthesitis-related arthritis (ERA) and/or inflammatory  
102 back pain further supporting a role for inflammation in this disorder<sup>18, 24</sup>. Furthermore,  
103 inflammatory/autoimmune disorders are prevalent in first-degree family members<sup>8, 25, 26</sup>.

104 As is true in other rare pediatric rheumatological conditions (including ERA and  
105 Sydenham chorea), observational studies in PANS suggest that non-steroidal anti-inflammatory  
106 drugs (NSAIDs) and corticosteroids may alleviate symptoms and/or shorten the length of the  
107 relapses<sup>27-29</sup>. More potent immunomodulators, such as intravenous immunoglobulin (IVIg) and a

108 B-cell inhibitor Rituximab have mixed results, likely due to the genetic heterogeneity and the  
109 difficulty in appropriately powering randomized trials in relapsing/remitting conditions<sup>30, 31</sup>.

110 An immune-based etiology is also suggested in some cases of ASD and NDD,  
111 especially acute and subacute regression, which have some symptoms that overlap with PANS  
112 and respond to immunomodulators<sup>32-35</sup>. In addition, a strong family history of autoimmune  
113 disorders is associated with an increased risk for ASD<sup>36-38</sup>.

114 We are interested in identifying genetic factors that underlie the development of PANS  
115 and acute behavioral regression using next-generation sequencing. In our original paper, two of  
116 the ultrarare variants we found are in genes that affect DDR (*PPM1D* and *CHK2*), and one  
117 induces DNA breaks (*RAG1*). *RAG1*, along with *RAG2*, codes for endonucleases that induce  
118 DNA double-strand breaks responsible for the somatic recombination that generates immune  
119 cell diversity in B- and T-lymphocytes<sup>1, 39, 40</sup>. *RAG1/RAG2* also affects NK cell differentiation and  
120 plays a role in DNA transposition<sup>41, 42</sup>. Double-stranded breaks induced by the RAG complex are  
121 repaired by ATM, a serine/threonine kinase that orchestrates DNA repair at double-strand  
122 breaks<sup>40, 43-45</sup>.

123 Our overarching aim is to identify genetic variations that converge on common biological  
124 pathways within the heterogeneous population of children with PANS or acute-onset regression  
125 with or without premorbid NDD. Given the findings in our first PANS genetic study, one common  
126 pathway is DNA repair. This hypothesis is supported by the findings in this paper in which many  
127 other genes involved in DNA repair were identified that may contribute to genetic vulnerability.

128

## 129 **Subjects and Methods**

### 130 **Ethical considerations**

131 This study was conducted in accordance with the Declaration of Helsinki. Parents signed  
132 informed consent approved by the Albert Einstein College of Medicine IRB (2022-14636).

133

134 **Subjects.** The subjects were identified through connections between the senior investigators  
135 and a PANS group called EXPAND, a non-profit European advocacy organization for families of  
136 children, adolescents, and adults with immune-mediated neuropsychiatric disorders  
137 (<https://expand.care/>), through the Neuroimmune Foundation, a non-profit organization  
138 dedicated to neuroimmune and inflammatory brain conditions (<https://neuroimmune.org/about/>),  
139 The Louisa Adelynn Johnson Fund for Complex Disease  
140 (<https://tlajfundforcomplexdisease.com/>), and the Jansen de Vries Syndrome Foundation  
141 (<https://jansen-devries.org/>). Histories were obtained by the participating physicians and

142 confirmed and collated by one of the senior investigators who interviewed every family member  
143 (H.M.L). The cases met the criteria for PANS with or without co-morbid ASD or NDD, or  
144 individuals with ASD or other NDDs who had a history of rapid-onset behavioral regression.

145

#### 146 **Genetic analyses**

147 Whole exome sequencing (WES) data was available for six cases (**Table**). WES was carried out  
148 by different companies Courtagen Diagnostics Laboratory, GeneDx, Baylor Genetics, and for  
149 case 10, WES was conducted locally in the Genetics Core at the Albert Einstein College of  
150 Medicine, Epigenetics Shared Facility. For the remaining cases, data was available from  
151 commercially available panels: Invitae (Primary Immunodeficiency Panel), NHS North West  
152 (NDD panel). The genetic variants for cases 1 and 4-12 were verified using Sanger sequencing  
153 (see **Table** and **Supplementary Methods**). A comprehensive description of the library  
154 preparation and analysis of sequencing data for the Einstein sample (case 10) can be found in  
155 the **Supplementary Methods** section. Parents were genotyped for variants found in all cases  
156 except cases 10, and 13-16.

157

#### 158 **Evaluation of Variants**

159 Minor allele frequencies (MAFs) were obtained from the GnomAD database on the UCSC  
160 Genome Browser (<https://genome.ucsc.edu/>). The ClinVar database, Combined Annotation-  
161 Dependent Depletion (CADD), and AlphaMissense were used to predict the pathogenicity of  
162 mutations<sup>46-49</sup>. <https://www.ncbi.nlm.nih.gov/clinvar/>. RNAfold was used to predict the secondary  
163 structure of RMRP. A detailed explanation is in the **Supplementary Methods** section.

164

#### 165 **Results**

166 Ultrarare variants (MAF <0.001) affecting DNA repair genes were found in 16 cases (10 males  
167 and 6 females; specific sex of cases not included to maintain anonymity) including four families  
168 with two or more affected individuals. The identified genes are involved in the p53 repair  
169 pathway: *PPM1D* (2 cases), *ATM* (5 cases), *ATR* (2 cases), and *53BP1* (one case) (**Figure 1**),  
170 and the Fanconi Anemia Complex (FC): *FANCF* (2 cases), *FANCP/SLX4* (2 cases), *FANCI*,  
171 and *FANCA* (one case each) (**Figure 2**; see **Table** for details on all p53 and FC gene variants).  
172 The FC pathway repairs DNA interstrand crosslinks and interacts with ATM/ATR/p53 DNA  
173 repair pathways (**Figure 2**)<sup>50-55</sup>. In addition, ultrarare variants were found in 32 other genes,  
174 many of which have effects on DNA repair and innate immune function (see **Supplementary**  
175 **Table** for details on all additional variants for this and other cases described in this paper).

176 STRING was used to show the connections between the DNA repair genes and other variants  
177 found in this study, which centered around ATM and p53 (**Figure 3**). The cases and genetic  
178 variants with their potential impact on the phenotypes are described below.

179

### 180 **p53 DNA Repair Pathway (*PPM1D*, *ATM*, *ATR*, *53BP1*)**

#### 181 **PPM1D (Protein phosphatase, Mg<sup>2+</sup>/Mn<sup>2+</sup>-dependent 1D)**

182 Case 1 has JdVS with a 1:1 mosaicism for a de novo truncating *PPM1D* variant in exon 6. The  
183 patient was diagnosed with mild intellectual disability but was high functioning, requiring minimal  
184 support until high school when the patient had an abrupt onset of OCD, anxiety, cognitive  
185 regression, insomnia, and psychosis with rapid decline over approximately three weeks. The  
186 deterioration coincided with an upper respiratory infection and vasculitis. Further regression  
187 occurred with the loss of previously mastered global abilities and eventual development of  
188 mutism, which has persisted for several years, unresponsive to psychiatric medications and  
189 other clinical and behavioral interventions.

190 Two additional ultrarare de novo variants were found and are likely pathogenic, one of  
191 which is relevant to the DDR hypothesis: a variant in *CSNK1a1*, which codes for Casein Kinase  
192 1 Alpha 1, a p53 inhibitor<sup>56, 57</sup>. Another was found in *SRPK3*, an SRSF Protein Kinase that has  
193 no known effect on DDR, although interestingly, expression is inversely correlated with alpha-  
194 synuclein levels in mouse models of Parkinson's disease<sup>58</sup>. Finally, an inherited ultrarare,  
195 nonsense mutation was found in the citrate transporter, *SLC13A5* as well as a splice acceptor  
196 variant in *CACNA1S*.

197 Case 2 also has a typical JdVS variant (a truncating mutation in *PPM1D* exon 6) and  
198 was diagnosed with ASD and a learning disability. The patient has periods of abrupt onset  
199 behavioral regression lasting several days to months, characterized by eating refusal, rage,  
200 cognitive deficits, loss of previously learned skills, an inability to walk, and enuresis. The most  
201 severe relapses have occurred following infection with SARS-CoV2 and a Group A  
202 Streptococcal infection concurrent with shingles.

203

#### 204 **ATM (Ataxia-telangiectasia mutated or serine/threonine kinase)**

205 Case 3 carries an ultrarare and pathological frameshift mutation in *ATM*. The patient was  
206 typically developing and excelled in school until adolescence when diagnosed with Postural  
207 Orthostatic Tachycardia Syndrome (POTS), irritable bowel syndrome gastroparesis, and  
208 enthesitis-related arthritis. Soon thereafter, an episode of gastroenteritis led to acute-onset  
209 OCD, anxiety, impulsivity, and severe rage; the first of many such episodes. An MRI scan was

210 negative. Relapses responded to IVIg and steroid bursts; however, due to frequent relapses and  
211 the development of chronic symptoms, a trial of Rituximab was undertaken, which was helpful.  
212 While the patient appeared to respond to immunomodulation, severe symptoms returned when  
213 these therapies were tapered or discontinued. Multiple hospitalizations for uncontrolled  
214 psychiatric symptoms followed. A parent carries the same ATM variant and has a history of  
215 dysautonomia and an inflammatory skin conditions.

216 Other ultrarare variants found in this patient include a de novo variant in *AHNAK2* and  
217 compound heterozygosity for two ultrarare *CACNA1H* variants. While there are no obvious  
218 connections to DNA repair, *AHNAK2* has been implicated in systemic lupus erythematosus  
219 (SLE) in two studies and *CACNA1H* mutations are found in ASD and intellectual disabilities<sup>59-62</sup>.

220 Cases 4-7 are a family with four affected children who all carry a pathogenic parental  
221 transmitted ATM splice donor mutation. There is a bilneal parental history of severe autoimmune  
222 disorders and hypermobile joints, as well as an extended family history of early-onset cancer,  
223 and autoimmune disorders. This is consistent with the increased risk of cancer and autoimmune  
224 disorders in individuals with loss of function mutations in *ATM*<sup>63-66</sup>.

225 Case 4, the proband, was diagnosed with ASD and experienced a typical PANS  
226 relapsing-remitting course with abrupt relapses of OCD, food aversion, anxiety, irritability,  
227 impulse control problems, oppositional behaviors, tics, and fatigue. Relapses were commonly  
228 coincident with infections and were effectively managed by addressing infections with antibiotics  
229 and using IVIg. The proband also has a history of Hashimoto's thyroiditis, joint hypermobility,  
230 and consistently low immunoglobulin levels which likely contributed to frequent infections.  
231 Alongside the *ATM* variant, the patient inherited rare and ultrarare variants affecting DNA repair  
232 and innate immunity including a likely pathogenic variant in *RNASEH2B*, which codes for  
233 Ribonuclease H2, an enzyme that removes ribonucleotides that have been incorporated into  
234 replicating DNA, affecting double-stranded break repair kinetics<sup>67</sup>. Homozygosity for this variant  
235 leads to Aicardi-Goutières syndrome (AGS), a type I interferonopathy characterized by  
236 neurodevelopmental defects and upregulation of type I interferon signaling and  
237 neuroinflammation due to the effects of DNA damage<sup>67, 68</sup>. The patient also has ultrarare  
238 nonsynonymous variants of unknown significance in *RAG2*, *NOD2*, and a 24-base pair  
239 microduplication in *SP110*. Each of these genes has effects on innate immunity, but *RAG2* is the  
240 only one with a strong connection to DNA repair, as described in the introduction<sup>1, 39, 40, 69</sup>. An  
241 *NOD2* variant was transmitted from one of the parents. A second ultrarare variant in *NOD2* was  
242 identified in the other parent (see **Supplementary Table**).



243 Cases 5-7 are siblings to case 4 who were all diagnosed with ASD, dysautonomia, and  
244 joint hypermobility. They all have a relapsing-remitting course characterized by abrupt onset  
245 OCD, anxiety, emotional lability, increased urinary frequency, oppositional behavior, and  
246 reduced social interactions, along with cognitive and behavioral regression. Relapses are  
247 typically coincident with infection. Case 5 had an MRI that showed right temporal sclerosis.  
248 Cases 6 and 7 have epilepsy, low levels of IgM and IgA, and relapses improve after clearance  
249 of infection and treatment with IVIg and/or a corticosteroid burst. Although they were not  
250 analyzed by WES, each was analyzed by Sanger sequencing for the variants found in the  
251 proband. Each sibling has inherited the *ATM* variant, and cases 5 and 6, the *RNASEH2B*  
252 variant. They have also inherited one of the two *NOD2* variants.

253

#### 254 **ATR (Ataxia telangiectasia and rad3-related protein)**

255 Cases 8 and 9 are siblings with regressive ASD and a relapsing-remitting course with relapses  
256 commonly coincident with infections. They both have a unique, transmitted ultrarare *ATR* variant  
257 of unknown significance. One parent has a history of Hashimoto's thyroiditis and a family history  
258 of SLE, and the other parent has a history of joint hypermobility and childhood seizure disorder.  
259 *ATR* is a serine/threonine kinase and DNA damage sensor that functions as a master regulator  
260 of the DDR<sup>70-74</sup>. The proband, case 8, was a typically developing child with hypermobility who  
261 was well until abrupt behavioral regression occurred following "croup" at which time a diagnosis  
262 of ASD was made. The patient subsequently developed a relapsing-remitting course  
263 characterized by abrupt onset OCD, aggression, and mutism. Relapses appeared to be  
264 responsive to NSAIDs.

265 The proband's sibling, Case 9, was well until the development of an abrupt behavioral  
266 regression and loss of previously achieved milestones following a herpesvirus 6 infection, after  
267 which a diagnosis of ASD was made. The patient also has a relapsing-remitting course  
268 characterized by abrupt onset of OCD, restricted eating, rage, and depression. Relapses are  
269 typically coincident with infections. Symptoms typically respond to glucocorticoid bursts. MRI  
270 showed atrophy of the hippocampus, amygdala, caudate, and putamen. WES analysis of both  
271 cases 8 and 9 also revealed several other ultrarare variants of interest: *NLRX1*, *CENPJ*,  
272 *CACNA1S*, *DBH*, and *CLPB*. The most interesting from the DNA repair perspective is a  
273 pathogenic frameshift mutation in *CENPJ*, which codes for centromere protein J. Centromere  
274 regulation is critical for maintaining genomic stability, and defects lead to aberrant mitosis and  
275 activation of the cGAS-STING pathway<sup>74, 75</sup>. It is interesting to note that biallelic mutations in  
276 *CENPJ* and *ATR* can both cause Seckel syndrome, which is associated with cell-cycle

277 checkpoint signaling abnormalities<sup>76, 77</sup>. Another variant was found in *NLRX1*, which codes for a  
278 key player in the innate immune response that regulates NF- $\kappa$ B expression and has been  
279 implicated in autoimmune and inflammatory diseases<sup>78-81</sup>. A third sibling is typically developing  
280 and did not inherit the *ATR* variant but carries the *CENPJ*, *CACNA1S*, and *CLPB* variants.  
281 Thus, the two affected siblings with ASD and acute-onset neuropsychiatric symptoms have  
282 ultrarare variants in two genes that affect DNA repair, *ATR*, and *CENPJ*, as well as *NLRX1*  
283 *DBH*, *CACNA1S*, and *CLPB*.

284

### 285 **53BP1 (Tumor suppressor p53-binding protein 1)**

286 Case 10 has a history of developmental delay, and experienced severe regression as a young  
287 child characterized by loss of the ability to walk, loss of verbal skills, and new-onset enuresis.  
288 Upon WES, we found an ultrarare missense mutation in *53BP1*, a p53-binding protein that  
289 regulates DDR<sup>82-84</sup>. A preceding infection to initial deterioration was not ascertainable.  
290 However, the patient developed a relapsing-remitting course with relapses (abrupt onset of  
291 OCD, eating refusal, severe rage, and oppositional behavior) coincident with infections with  
292 improvement following treatment infections with antibiotics. The patient also developed  
293 Hashimoto's thyroiditis, scoliosis, joint hypermobility, and gastroparesis. A parent has a history  
294 of Raynaud's and fibromyalgia, and there is a family history of thyroid disease and Parkinson's  
295 Disease. Parents have not been genotyped. In addition to *53BP1*, several other ultrarare  
296 variants were found that could be playing a role in the clinical state via DNA repair. One is  
297 *MED1*, which codes for a mediator complex protein that plays a major role in homologous  
298 recombination, base excision repair, the maintenance of genomic stability, and p53-dependant  
299 apoptosis<sup>85</sup>. It has also been implicated in SLE<sup>86</sup>. Another is *KMT2D*, which codes for a histone  
300 methyltransferase that plays a role in DNA repair and has been implicated in autoimmune  
301 disorders<sup>87, 88</sup>. Finally, we found a nonsense mutation in *MTO1*, which regulates oxidative  
302 phosphorylation and has been found to affect DNA repair and recombination in yeast<sup>89, 90</sup>.

303

### 304 **Fanconi Anemia Complex (FANCE, FANCP/SLX4, FANCA, and FANCI)**

#### 305 **FANCE (Fanconi anemia complementation group E)**

306 Cases 11 and 12, a sibling pair with common variable immune deficiency (CVID) and acute  
307 onset of neuropsychiatric symptoms; both carry an ultrarare missense mutation in *FANCE*.  
308 Case 11 met the diagnostic criteria for PANS, characterized by a relapsing-remitting course of  
309 abrupt onset OCD, anxiety, and rage. Episodes were commonly coincident with group A  
310 streptococcal infection and other infections and always improved after treating the infection

311 followed by a corticosteroid burst. IVIg (aimed to treat the underlying CVID) was associated with  
312 a reduced frequency of relapses but did not reduce the severity of relapses. Case 12 was  
313 diagnosed with ASD as a child after the abrupt loss of speech and eye contact following an  
314 infection. The patient regained eye contact and sociability, but apraxia of speech continued. He  
315 regressed again later in childhood and soon thereafter was diagnosed with PANS characterized  
316 by abrupt onset of OCD, anxiety, aggression (self-injurious behavior and property destruction),  
317 and tics, which improved after treating the infection followed by corticosteroids. The patient  
318 subsequently developed acute onset dysarthria and mutism and further evaluation revealed  
319 CSF pleocytosis, intracranial hypertension, and GAD antibodies (three times the upper limit of  
320 normal). Subsequent relapses responded to addressing infection followed by a corticosteroid  
321 burst. Relapse frequency (but not severity) was reduced following the introduction of IVIg to  
322 treat CVID. Due to a chronic progressive course, Rituximab was added, which was followed by  
323 documented improvements by the speech pathologist that were lost when B cells were  
324 repopulated (the speech pathologist was blinded to treatments and B cell repopulation).  
325 Consequently, Rituximab was scheduled quarterly. The clinical trajectory improved but  
326 deteriorations coincident with infections occurred, so Leflunomide was added as adjunct therapy  
327 which has led to further stabilization for 2 years. There is a positive history of an inflammatory  
328 skin disease on both sides of the family and a family history of an immunodeficiency syndrome,  
329 arthritis, lupus-related autoantibodies, recurrent sepsis, and recurrent septic joints. Both cases  
330 carry an ultrarare variant of unknown significance in *VPS13B*. Case 11 carries a maternally  
331 transmitted *NOD2* variant that has been described as a risk allele in Crohn's disease<sup>90, 91</sup>. Case  
332 12 carries another ultrarare, pathogenic, novel variant involved in the DNA repair gene,  
333 *THRAP3*, which codes for thyroid hormone receptor-associated protein 3, an RNA processing  
334 factor involved in ATR kinase-dependent DDR and the expression of several DNA repair  
335 proteins, including FANCL<sup>92, 93</sup>.

336

### 337 **FANCI (Fanconi anemia, complementation group I)**

338 Case 13 is a neurotypical child who developed a sudden onset of OCD, fatigue, restricted  
339 eating, severe anxiety, enuresis, and insomnia following an upper respiratory infection.  
340 Autoimmune thyroiditis was diagnosed based on having high titers of anti-thyroid peroxidase  
341 and anti-thyroglobulin antibodies, an elevated TSH, and an ultrasound. A nonsense mutation in  
342 *FANCI* was identified. There was a partial response to intravenous glucocorticoids, IVIg, and  
343 Rituximab. Case 11 also carries ultrarare variants in two other genes that affect DNA repair.  
344 One is a non-synonymous variant in another FC gene, *FANCP/SLX4*, which may be a benign

345 variant. However, cases 14 and 15 also have an ultrarare variant in this gene (see below). The  
346 other is a variant in the DNA repair gene, *LIG4*, which codes for DNA Ligase IV, a key enzyme  
347 involved in repairing DNA double-strand breaks through non-homologous end joining and  
348 sealing DNA breaks that occur during V(D)J recombination<sup>94, 95</sup>. *LIG4* mutations cause  
349 autoimmune and immunodeficiency disorders<sup>95, 96</sup>.

350

### 351 **FANCP/SLX4 Fanconi anemia, complementation group P/Structure-Specific** 352 **endonuclease subunit)**

353 Cases 14 and 15 are siblings diagnosed with CVID who carry a pathogenic mutation in  
354 *TNFRSF13B*, which is one of the more common variants found in immune deficiencies<sup>97, 98</sup>. The  
355 same variant has been found in several other PANS cases (unpublished observations). They  
356 also share an ultrarare variant in *FANCP/SLX4*, but the relatively low CADD score suggests that  
357 the gene alone is not sufficient to explain the severe clinical presentation. Case 14 has a history  
358 of acute neuropsychiatric decompensation consistent with PANS, who initially responded to  
359 treatment with corticosteroid bursts and IVIg and further stabilized on Anakinra. Case 15 initially  
360 presented with anxiety but has regressed substantially, developing a seizure disorder and  
361 autoimmune encephalitis (AE) that has partially responded to Rituximab, glucocorticoids, and  
362 IVIg. Anakinra has not been effective. MRI indicates atrophy. The siblings also have an ultrarare  
363 missense mutation adjacent to a splice acceptor site in *DOCK8*, which has been implicated in  
364 immune deficiency and autoimmune disorders<sup>65, 99</sup>. Both also share a variant in *MEFV* (pyrin),  
365 an inflammasome regulator gene that is commonly mutated in autoinflammatory disorders<sup>100-103</sup>.  
366 Finally, they both have an ultrarare variant in *RMRP*, a noncoding RNA that functions as the  
367 RNA component of mitochondrial RNA processing endoribonuclease. This is a very intriguing  
368 candidate according to our DNA repair model as it acts as an inhibitor of p53<sup>104, 105</sup>. A  
369 comparison between wild-type and mutant alleles using RNAfold shows differences in the  
370 secondary structure, suggesting that it could be functional (**Supplementary Figure**).

371

### 372 **FANCA Fanconi Anemia, Complementation Group A**

373 Case 16 is a previously healthy and neurotypical child who presented with abrupt-onset OCD,  
374 eating restriction, severe irritability, hyperactivity, aggression, mood swings, sensory  
375 amplification, and headaches. Physical exams showed truncal instability, subtle choreiform  
376 movements, folliculitis, and findings consistent with enthesitis and arthritis (confirmed on joint  
377 ultrasound). Labs indicate persistently elevated vasculitis markers (high vWF Ag and D-dimers  
378 after COVID-19), persistently elevated C4, and persistent microcytic anemia thought to be

379 secondary to chronic inflammation. The patient has had a secondary progressive course with  
380 relapses coincident with infections (influenza, mycoplasma, COVID-19, and sinusitis) with partial  
381 improvement after bacterial infections were treated. Psychotropics and CBT have been  
382 minimally helpful. The patient did not tolerate oral or IV steroids, IVIG, or immunomodulation  
383 aimed at treating arthritis and systemic inflammation (e.g., methotrexate, sulfasalazine, and  
384 azathioprine). There has been a partial response to NSAIDs, and more recently, a solid  
385 trajectory of improvement since introducing colchicine. An ultrarare pathogenic variant  
386 (according to AlphaMissense) was found in *FANCA*. In addition, ultrarare variants were found in  
387 five other genes that have effects on innate immune function, but no direct effect on DNA repair.  
388 The most important is a pathogenic variant in *UNC93B1*, a regulator of nucleic acid-sensing toll-  
389 like receptors (e.g., TLR3, TLR7, and TLR8) and interferon and STING signaling, suggesting a  
390 synergistic interaction with *FANCA*-related DNA repair defects<sup>106-108</sup>. The others are ultrarare  
391 variants of unknown significance in *NLRP1*, *TICAM1*, *TYK2*, and *TCN2*. *NLRP1*, *TICAM1*, and  
392 *TYK2* have regulatory effects on the innate immune system, including nucleic acid sensing, and  
393 have been implicated in autoimmune disorders<sup>109-112</sup>.

394 First-degree relatives have migraines, recurrent sinusitis, recurrent pancreatitis, and  
395 spondylarthritis. First-degree family members also have anxiety, OCD, ADHD, and depression.  
396

## 397 **Discussion**

398 Sixteen cases were identified with ultrarare variants in protein-coding genes related to p53 and  
399 FC DNA repair pathways: *PPM1D*, *ATM*, *ATR*, *53BP1*, *FANCE*, *FANCI*, *FANCP/SLX4*, and  
400 *FANCA*. These were often accompanied by additional rare variants related to DNA repair and/or  
401 immune deficiencies. Most individuals in this study have an underlying neurodevelopmental  
402 disorder, with approximately half diagnosed with ASD. The unifying feature for these cases is  
403 the distinct, acute onset change in behavior, severe psychiatric symptoms, and loss of function  
404 in association with infections and other stressors. Many cases have symptoms consistent with  
405 PANS, while others had acute, severe neuropsychiatric decompensation (e.g., mutism,  
406 behavioral regression, loss of previously learned skills, cognitive dysfunction) that did not meet  
407 clinical criteria for PANS. Co-morbid inflammatory conditions were common, including vasculitis  
408 signs (n=2), enthesitis and/or arthritis (n=3), thyroiditis, and/or elevated thyroid antibodies (n=3).  
409 Inflammatory conditions were also common among first-degree family members. Three cases  
410 had abnormal MRI scans (cases 5, 9, and 15), and one (case 3) had a normal study.  
411 Pleocytosis and moderately elevated anti-GAD antibodies were found in case 12. Clinical  
412 improvement was observed in most cases following the resolution of infections and the

413 application of immunomodulation (NSAIDs, corticosteroids, IVIg, Rituximab, colchicine, etc.).  
414 The findings are congruent with our previous work and provide further support for our  
415 hypothesis that DNA repair deficits are a vulnerability factor for neuropsychiatric  
416 decompensation.

417 The DNA repair hypothesis first emerged from our original genetic analysis in which  
418 three out of the five immune genes we identified have strong connections to this process:  
419 *PPM1D*, *CHK2*, and *RAG1*<sup>1</sup>. The idea that DNA repair deficits underlie PANS and acute  
420 decompensation in NDD is novel, although studies linking DDR to behavior have been  
421 described. For example, postmitotic genome instability in neurons can lead to behavioral  
422 alterations and neurodegenerative disorders, and genetic studies show that DNA repair genes  
423 are involved in genetic subgroups of ASD and NDDs including most of the genes described in  
424 this report (e.g., *PPM1D*, *ATM*, *ATR*, *53BP1*, *FANCE*, *FANCI*, and *FANCP/SLX4*)<sup>113-120</sup>.

425 The two major gene families affecting DNA repair described in this paper code for  
426 proteins involved in the p53 and FC pathways. So far, between the current study and our  
427 previous report, we have found ultrarare variants in five protein-coding genes that directly affect  
428 p53: *PPM1D*, *ATM*, *CHK2*, *ATR*, and *53BP1*. Among these genes, pathogenic mutations were  
429 found in *PPM1D*, *ATM*, and, in our previous study, *CHK2*. The ultrarare *ATR* and *53BP1*  
430 variants described in this paper, however, are variants of unknown significance that will require  
431 replication and functional validation. Remarkably, we also found an ultrarare variant in the long  
432 non-coding RNA gene, *RMRP*, a p53 inhibitor<sup>104, 105</sup>. *RMRP* expression is induced by immune  
433 activators and is increased in autoimmune/autoinflammatory disorders<sup>121</sup>. As described in the  
434 results section, structural differences between the mutant and wild-type alleles were predicted  
435 by RNAfold, but again, functional validation would be needed to determine whether the *RMRP*  
436 variant we identified affects p53 function and DNA repair.

437 Ultrarare variants were found in four different FC genes: *FANCE*, *FANCP/SLX4*, *FANCI*,  
438 and *FANCA*. Among these, all are predicted to be pathogenic, except the *FANCP/SLX4*  
439 variants. However, the fact that two different ultrarare variants were found in this gene in three  
440 cases from two families increases the likelihood they are playing a role. Interestingly, FC  
441 proteins interact with components of the p53 DDR pathway, including *ATM* and *ATR* (**Figure**  
442 **2**)<sup>122-125</sup>.

443 Some researchers have suggested that autoimmune and/or autoinflammatory processes  
444 underlie the development of behavioral regression in PANS and in a subgroup of individuals  
445 with ASD<sup>35, 126-128</sup>. Impaired DDR may be one mechanism for these associations as it can lead to  
446 leakage of nuclear DNA into the cytosol, which can trigger the cGAS-STING pathway, a key

447 component of the type I interferon (IFN-I) anti-viral innate immune response, especially following  
448 an infectious disease trigger<sup>66, 129-131</sup>. Mitochondrial DNA breaks and oxidized mitochondrial DNA  
449 released into the cytosol can also trigger cGAS-STING<sup>132-134</sup>. AIM2 inflammasome signaling,  
450 which leads to the induction of IL-1 $\beta$  and IL-18, is also triggered by cytosolic DNA<sup>135, 136</sup>.

451 Physiological activation of cGAS-STING is central for the response to foreign viral DNA,  
452 and perhaps viral RNA as well<sup>41</sup>. However, studies show that over-activation can lead to  
453 autoimmune, autoinflammatory, and neurodegenerative disorders<sup>137-140</sup>. For example, increased  
454 IFN-I responses mediated by cGAS-STING due to abnormal clearance of cytosolic DNA and  
455 RNA have been implicated in the pathogenesis of autoimmune disorders including SLE and  
456 aggressive rheumatoid arthritis<sup>141-144</sup>. Circulating type I IFN levels are elevated in approximately  
457 50% of patients with SLE and IFN receptor inhibition is an approved therapy<sup>145, 146</sup>. A substantial  
458 fraction of SLE patients have neuropsychiatric symptoms<sup>147, 148</sup>. It has also been proposed that  
459 some neurodegenerative disorders involve cGAS-STING signaling, including Alzheimer's  
460 Disease (AD), Parkinson's Disease (PD), Amyotrophic Lateral Sclerosis (ALS), Huntington's  
461 disease (HD), and multiple sclerosis (MS)<sup>149-151</sup>. Markers for neurodegenerative disorders are  
462 elevated in 27% of patients with psychiatric disease preselected for suspected immunological  
463 involvement and phenotypes including catatonia, agitation, and acute onset of symptoms similar  
464 to the cases described here, although the genetic data is not available  
465 (<https://doi.org/10.21203/rs.3.rs-3491787/v1>). Early immunological interventions may mitigate  
466 some damage, but this needs to be confirmed in clinical trials. However, other forms of damage  
467 may accumulate over time that are not responsive to immunological interventions.

468 In addition to nuclear DNA, disruption of mitochondrial integrity can also lead to the  
469 release of mitochondrial DNA into the cytoplasm, which is a potent cGAS-STING trigger<sup>132-134</sup>. A  
470 few of the genes described in this report have effects on mitochondria (e.g., *MTO1*, *SLC13A5*,  
471 *RMRP*). Some FC proteins also regulate mitochondrial DNA replication fork stability that can  
472 activate the mtDNA-dependent cGAS/STING response when dysfunctional, and FANCI has  
473 been found to regulate PRKN-mediated mitophagy<sup>152, 153</sup>.

474 A large number of cases had more than one DNA repair gene mutation. This could be  
475 due to ascertainment bias since most of the cases we studied had severe symptoms and  
476 accompanying neurodevelopmental problems, which could have prompted genetic testing by  
477 their physicians. Gene panels rather than WGS per se were performed in many cases, which  
478 could cause ascertainment bias due to the selection of genes represented on the commercially  
479 available gene panels (**Table**). However, the histories of autoimmune disorders from both  
480 parents in many cases suggest true bilineal inheritance of risk variants.

481 The current paper explores a genetic subgroup linked to impaired DNA repair with acute  
482 onset of severe psychiatric symptoms or regression in children associated with infections. It is  
483 important to note that non-infectious cellular stressors can also induce DNA damage and  
484 activate cGAS-STING, such as cellular injury, heat shock, and oxidative stress<sup>154, 155</sup>. In  
485 addition, recent studies suggest that faulty DNA repair could disrupt several cellular processes  
486 beyond an innate immune response, such as autophagy, senescence, and apoptosis<sup>156-158</sup>.

487 Clinically, if our findings are confirmed, they could lead to specific diagnostic tools and  
488 new treatments for infection-associated psychiatric episodes and behavioral decompensation in  
489 PANS, ASD, and other NDDs in those with DNA repair mutations, targeting putative over-  
490 stimulated immune pathways (e.g., type I interferons and AIM2 inflammasomes). To validate our  
491 findings, more studies are needed to integrate longitudinal clinical data, genetics, and  
492 immunophenotypes. Functional studies on immune cells from patients, and microglia from  
493 animal models and induced pluripotent stem cells (iPSCs) are also needed. Studies using iPSC-  
494 derived microglia with genetic variants in DNA repair genes are ongoing.

#### 495 References

- 496 1. Trifiletti, R. *et al.* Identification of ultra-rare genetic variants in pediatric acute onset  
497 neuropsychiatric syndrome (PANS) by exome and whole genome sequencing. *Sci. Rep.* **12**,  
498 11106-3 (2022).
- 499 2. Bhattacharya, D., Hiregange, D. & Rao, B. J. ATR kinase regulates its attenuation via PPM1D  
500 phosphatase recruitment to chromatin during recovery from DNA replication stress signalling. *J.*  
501 *Biosci.* **43**, 25-47 (2018).
- 502 3. Jansen, S. *et al.* De Novo Truncating Mutations in the Last and Penultimate Exons of PPM1D  
503 Cause an Intellectual Disability Syndrome. *Am. J. Hum. Genet.* **100**, 650-658 (2017).
- 504 4. Gräf, J. F. *et al.* Substrate spectrum of PPM1D in the cellular response to DNA double-strand  
505 breaks. *iScience* **25**, 104892 (2022).
- 506 5. Nahta, R. & Castellino, R. C. Phosphatase magnesium-dependent 1 δ (PPM1D),  
507 serine/threonine protein phosphatase and novel pharmacological target in cancer. *Biochem.*  
508 *Pharmacol.* **184**, 114362 (2021).
- 509 6. Zekavat, S. M. *et al.* TP53-mediated clonal hematopoiesis confers increased risk for incident  
510 atherosclerotic disease. *Nat. Cardiovasc. Res.* **2**, 144-158 (2023).
- 511 7. Jyonouchi, H., Geng, L. & Davidow, A. L. Cytokine profiles by peripheral blood monocytes are  
512 associated with changes in behavioral symptoms following immune insults in a subset of ASD  
513 subjects: an inflammatory subtype? *J. Neuroinflammation* **11**, 187-2 (2014).



- 514 8. O'Dor, S. L. *et al.* A Survey of Demographics, Symptom Course, Family History, and Barriers  
515 to Treatment in Children with Pediatric Acute-Onset Neuropsychiatric Disorders and Pediatric  
516 Autoimmune Neuropsychiatric Disorder Associated with Streptococcal Infections. *J. Child*  
517 *Adolesc. Psychopharmacol.* **32**, 476-487 (2022).
- 518 9. Giedd, J. N., Rapoport, J. L., Garvey, M. A., Perlmutter, S. & Swedo, S. E. MRI assessment  
519 of children with obsessive-compulsive disorder or tics associated with streptococcal infection.  
520 *Am. J. Psychiatry* **157**, 281-283 (2000).
- 521 10. Kumar, A., Williams, M. T. & Chugani, H. T. Evaluation of basal ganglia and thalamic  
522 inflammation in children with pediatric autoimmune neuropsychiatric disorders associated with  
523 streptococcal infection and tourette syndrome: a positron emission tomographic (PET) study  
524 using <sup>11</sup>C-[R]-PK11195. *J. Child Neurol.* **30**, 749-756 (2015).
- 525 11. Cabrera, B. *et al.* Neuroanatomical features and its usefulness in classification of patients  
526 with PANDAS. *CNS Spectr.* **24**, 533-543 (2019).
- 527 12. Zheng, J. *et al.* Association of Pediatric Acute-Onset Neuropsychiatric Syndrome With  
528 Microstructural Differences in Brain Regions Detected via Diffusion-Weighted Magnetic  
529 Resonance Imaging. *JAMA Netw. Open* **3**, e204063 (2020).
- 530 13. Chang, K. *et al.* Clinical evaluation of youth with pediatric acute-onset neuropsychiatric  
531 syndrome (PANS): recommendations from the 2013 PANS Consensus Conference. *J. Child*  
532 *Adolesc. Psychopharmacol.* **25**, 3-13 (2015).
- 533 14. Vreeland, A. *et al.* Neuroinflammation in Obsessive-Compulsive Disorder: Sydenham  
534 Chorea, Pediatric Autoimmune Neuropsychiatric Disorders Associated with Streptococcal  
535 Infections, and Pediatric Acute Onset Neuropsychiatric Syndrome. *Psychiatr. Clin. North Am.*  
536 **46**, 69-88 (2023).
- 537 15. Vreeland, A. *et al.* Post-infectious inflammation, autoimmunity, and OCD: Sydenham  
538 Chorea, Pediatric Autoimmune Neuropsychiatric Disorder Associated with Streptococcal  
539 infection (PANDAS), and Pediatric Acute-onset Neuropsychiatric Disorder (PANS). *Dev.*  
540 *Neurosci.* (2023).
- 541 16. Thienemann, M. *et al.* Clinical Management of Pediatric Acute-Onset Neuropsychiatric  
542 Syndrome: Part I-Psychiatric and Behavioral Interventions. *J. Child Adolesc. Psychopharmacol.*  
543 **27**, 566-573 (2017).
- 544 17. Chan, A. *et al.* Children With PANS May Manifest POTS. *Front. Neurol.* **13**, 819636 (2022).
- 545 18. Ma, M. *et al.* Arthritis in children with psychiatric deteriorations: a case series. *Dev.*  
546 *Neurosci.*, 1 (2023).
- 547 19. Foerde, K. & Shohamy, D. The role of the basal ganglia in learning and memory: insight  
548 from Parkinson's disease. *Neurobiol. Learn. Mem.* **96**, 624-636 (2011).

- 549 20. Swedo, S. E. *et al.* Pediatric autoimmune neuropsychiatric disorders associated with  
550 streptococcal infections: clinical description of the first 50 cases. *Am. J. Psychiatry* **155**, 264-271  
551 (1998).
- 552 21. Cunningham, M. W. Molecular Mimicry, Autoimmunity, and Infection: The Cross-Reactive  
553 Antigens of Group A Streptococci and their Sequelae. *Microbiol. Spectr.* **7**,  
554 10.1128/microbiolspec.GPP3-2018 (2019).
- 555 22. Hyman, S. E. PANDAS: Too Narrow a View of the Neuroimmune Landscape. *Am. J.*  
556 *Psychiatry* **178**, 5-7 (2021).
- 557 23. Wells, L., O'Hara, N., Frye, R. E., Hullavard, N. & Smith, E. Folate Receptor Alpha  
558 Autoantibodies in the Pediatric Acute-Onset Neuropsychiatric Syndrome (PANS) and Pediatric  
559 Autoimmune Neuropsychiatric Disorders Associated with Streptococcal Infections (PANDAS)  
560 Population. *Journal of personalized medicine* **14**, 166 (2024).
- 561 24. Frankovich, J. *et al.* Multidisciplinary clinic dedicated to treating youth with pediatric acute-  
562 onset neuropsychiatric syndrome: presenting characteristics of the first 47 consecutive patients.  
563 *J. Child Adolesc. Psychopharmacol.* **25**, 38-47 (2015).
- 564 25. Masterson, E. E. & Gavin, J. M. Baseline characteristics of children in the International  
565 PANS Registry (IPR) Epidemiology Study. *BMJ Open* **14**, e072743-072743 (2024).
- 566 26. Chan, A. *et al.* Familial Clustering of Immune-Mediated Diseases in Children with Abrupt-  
567 Onset Obsessive Compulsive Disorder. *J. Child Adolesc. Psychopharmacol.* **30**, 345-346  
568 (2020).
- 569 27. Brown, K. *et al.* Pediatric Acute-Onset Neuropsychiatric Syndrome Response to Oral  
570 Corticosteroid Bursts: An Observational Study of Patients in an Academic Community-Based  
571 PANS Clinic. *J. Child Adolesc. Psychopharmacol.* **27**, 629-639 (2017).
- 572 28. Brown, K. D. *et al.* Effect of Early and Prophylactic Nonsteroidal Anti-Inflammatory Drugs on  
573 Flare Duration in Pediatric Acute-Onset Neuropsychiatric Syndrome: An Observational Study of  
574 Patients Followed by an Academic Community-Based Pediatric Acute-Onset Neuropsychiatric  
575 Syndrome Clinic. *J. Child Adolesc. Psychopharmacol.* **27**, 619-628 (2017).
- 576 29. Spartz, E. J. *et al.* Course of Neuropsychiatric Symptoms After Introduction and Removal of  
577 Nonsteroidal Anti-Inflammatory Drugs: A Pediatric Observational Study. *J. Child Adolesc.*  
578 *Psychopharmacol.* **27**, 652-659 (2017).
- 579 30. Perlmutter, S. J. *et al.* Therapeutic plasma exchange and intravenous immunoglobulin for  
580 obsessive-compulsive disorder and tic disorders in childhood. *Lancet* **354**, 1153-1158 (1999).
- 581 31. Williams, K. A. *et al.* Randomized, Controlled Trial of Intravenous Immunoglobulin for  
582 Pediatric Autoimmune Neuropsychiatric Disorders Associated With Streptococcal Infections. *J.*  
583 *Am. Acad. Child Adolesc. Psychiatry* **55**, 860-867.e2 (2016).

- 584 32. Hart, S. J., Worley, G., Kishnani, P. S. & Van Mater, H. Case Report: Improvement  
585 Following Immunotherapy in an Individual With Seronegative Down Syndrome Disintegrative  
586 Disorder. *Front. Neurol.* **12**, 621637 (2021).
- 587 33. Bey, A. L. *et al.* Subacute Neuropsychiatric Syndrome in Girls With SHANK3 Mutations  
588 Responds to Immunomodulation. *Pediatrics* **145**, e20191490. doi: 10.1542/peds.2019-1490  
589 (2020).
- 590 34. Zheng, J. *et al.* Association of Pediatric Acute-Onset Neuropsychiatric Syndrome With  
591 Microstructural Differences in Brain Regions Detected via Diffusion-Weighted Magnetic  
592 Resonance Imaging. *JAMA Netw. Open* **3**, e204063 (2020).
- 593 35. Malek, M. *et al.* Prednisolone as Adjunctive Treatment to Risperidone in Children With  
594 Regressive Type of Autism Spectrum Disorder: A Randomized, Placebo-Controlled Trial. *Clin.*  
595 *Neuropharmacol.* **43**, 39-45 (2020).
- 596 36. Mohebalizadeh, M. *et al.* Role of Maternal Immune Factors in Neuroimmunology of Brain  
597 Development. *Mol. Neurobiol.* (2023).
- 598 37. Croen, L. A. *et al.* Family history of immune conditions and autism spectrum and  
599 developmental disorders: Findings from the study to explore early development. *Autism Res.*  
600 **12**, 123-135 (2019).
- 601 38. Arenella, M. *et al.* Immunogenetics of autism spectrum disorder: A systematic literature  
602 review. *Brain Behav. Immun.* **114**, 488-499 (2023).
- 603 39. Braams, M., Pike-Overzet, K. & Staal, F. J. T. The recombinase activating genes: architects  
604 of immune diversity during lymphocyte development. *Front. Immunol.* **14**, 1210818 (2023).
- 605 40. Christie, S. M., Fijen, C. & Rothenberg, E. V(D)J Recombination: Recent Insights in  
606 Formation of the Recombinase Complex and Recruitment of DNA Repair Machinery. *Front.*  
607 *Cell. Dev. Biol.* **10**, 886718 (2022).
- 608 41. Ni, G., Ma, Z. & Damania, B. cGAS and STING: At the intersection of DNA and RNA virus-  
609 sensing networks. *PLoS Pathog.* **14**, e1007148 (2018).
- 610 42. Chen, X. *et al.* How mouse RAG recombinase avoids DNA transposition. *Nat. Struct. Mol.*  
611 *Biol.* **27**, 127-133 (2020).
- 612 43. Helmink, B. A. & Sleckman, B. P. The response to and repair of RAG-mediated DNA  
613 double-strand breaks. *Annu. Rev. Immunol.* **30**, 175-202 (2012).
- 614 44. Johnston, R. *et al.* Nuclease-independent functions of RAG1 direct distinct DNA damage  
615 responses in B cells. *EMBO Rep.*, e55429 (2022).
- 616 45. Chu, S. H. *et al.* Loss of H3K36 Methyltransferase SETD2 Impairs V(D)J Recombination  
617 during Lymphoid Development. *iScience* **23**, 100941 (2020).

- 618 46. Rentzsch, P., Witten, D., Cooper, G. M., Shendure, J. & Kircher, M. CADD: predicting the  
619 deleteriousness of variants throughout the human genome. *Nucleic Acids Res.* **47**, D886-D894  
620 (2019).
- 621 47. Niroula, A. & Vihinen, M. How good are pathogenicity predictors in detecting benign  
622 variants? *PLoS Comput. Biol.* **15**, e1006481 (2019).
- 623 48. Kircher, M. *et al.* A general framework for estimating the relative pathogenicity of human  
624 genetic variants. *Nat. Genet.* **46**, 310-315 (2014).
- 625 49. Cheng, J. *et al.* Accurate proteome-wide missense variant effect prediction with  
626 AlphaMissense. *Science* **381**, eadg7492 (2023).
- 627 50. Ceccaldi, R., Sarangi, P. & D'Andrea, A. D. The Fanconi anaemia pathway: new players and  
628 new functions. *Nat. Rev. Mol. Cell Biol.* **17**, 337-349 (2016).
- 629 51. Jones, M. J. K. & Huang, T. T. The Fanconi anemia pathway in replication stress and DNA  
630 crosslink repair. *Cell Mol. Life Sci.* **69**, 3963-3974 (2012).
- 631 52. Traband, E. L. *et al.* Mitotic DNA Synthesis in Untransformed Human Cells Preserves  
632 Common Fragile Site Stability via a FANCD2-Driven Mechanism That Requires HELQ. *J. Mol.*  
633 *Biol.* **435**, 168294 (2023).
- 634 53. Bona, N. & Crossan, G. P. Fanconi anemia DNA crosslink repair factors protect against  
635 LINE-1 retrotransposition during mouse development. *Nat. Struct. Mol. Biol.* (2023).
- 636 54. Kupculak, M. *et al.* Phosphorylation by ATR triggers FANCD2 chromatin loading and  
637 activates the Fanconi anemia pathway. *Cell. Rep.* **42**, 112721 (2023).
- 638 55. Alcón, P. *et al.* FANCD2-FANCI is a clamp stabilized on DNA by monoubiquitination of  
639 FANCD2 during DNA repair. *Nat. Struct. Mol. Biol.* **27**, 240-248 (2020).
- 640 56. Xu, W. *et al.* Casein kinase 1 $\alpha$  inhibits p53 downstream of MDM2-mediated autophagy and  
641 apoptosis in acute myeloid leukemia. *Oncol. Rep.* **44**, 1895-1904 (2020).
- 642 57. Liu, X. *et al.* Tumor-derived CK1 $\alpha$  mutations enhance MDMX inhibition of p53. *Oncogene*  
643 **39**, 176-186 (2020).
- 644 58. Seo, M. H. & Yeo, S. Association Between Decreased Srpk3 Expression and Increased  
645 Substantia Nigra Alpha-Synuclein Level in an MPTP-Induced Parkinson's Disease Mouse  
646 Model. *Mol. Neurobiol.* **60**, 780-788 (2023).
- 647 59. Akizuki, S. *et al.* PLD4 is a genetic determinant to systemic lupus erythematosus and  
648 involved in murine autoimmune phenotypes. *Ann. Rheum. Dis.* **78**, 509-518 (2019).
- 649 60. Wen, L. *et al.* Exome-wide association study identifies four novel loci for systemic lupus  
650 erythematosus in Han Chinese population. *Ann. Rheum. Dis.* **77**, 417-211823. Epub 2017 Dec  
651 12 (2018).

- 652 61. Kessi, M. *et al.* Calcium channelopathies and intellectual disability: a systematic review.  
653 *Orphanet J. Rare Dis.* **16**, 219-0 (2021).
- 654 62. Viggiano, M. *et al.* Contribution of CACNA1H Variants in Autism Spectrum Disorder  
655 Susceptibility. *Front. Psychiatry.* **13**, 858238 (2022).
- 656 63. Woodward, E. R. *et al.* Germline testing of BRCA1, BRCA2, PALB2 and CHEK2 c.1100delC  
657 in 1514 triple negative familial and isolated breast cancers from a single centre, with extended  
658 testing of ATM, RAD51C and RAD51D in over 400. *J. Med. Genet.* (2023).
- 659 64. Stubbins, R. J., Korotev, S. & Godley, L. A. Germline CHEK2 and ATM Variants in Myeloid  
660 and Other Hematopoietic Malignancies. *Curr. Hematol. Malign Rep.* **17**, 94-104 (2022).
- 661 65. Azizi, G. *et al.* The Autoimmune Manifestations in Patients with Genetic Defects in the B Cell  
662 Development and Differentiation Stages. *J. Clin. Immunol.* **43**, 819-834 (2023).
- 663 66. Pezone, A. *et al.* Inflammation and DNA damage: cause, effect or both. *Nat. Rev.*  
664 *Rheumatol.* **19**, 200-211 (2023).
- 665 67. Ghosh, D., Kumari, S. & Raghavan, S. C. Depletion of RNASEH2 Activity Leads to  
666 Accumulation of DNA Double-strand Breaks and Reduced Cellular Survivability in T Cell  
667 Leukemia. *J. Mol. Biol.* **434**, 167617 (2022).
- 668 68. Viguera-Elías, D., de la Iglesia-Nagore, I., Toledo-Gotor, C., Domínguez-Garrido, E. & Poch-  
669 Olivé, M. L. Aicardi-Goutieres syndrome: a family case due to alteration of the RNASEH2B  
670 gene. *Rev. Neurol.* **72**, 407-409 (2021).
- 671 69. Walia, J. & Mujahid, R. Clinical Disease States Related to Mutations of the NOD2 Gene: A  
672 Case Report and Literature Review. *Cureus* **15**, e38584 (2023).
- 673 70. Priya, B., Ravi, S. & Kirubakaran, S. Targeting ATM and ATR for cancer therapeutics:  
674 Inhibitors in clinic. *Drug Discov. Today* **28**, 103662 (2023).
- 675 71. Maréchal, A. & Zou, L. DNA damage sensing by the ATM and ATR kinases. *Cold Spring*  
676 *Harb Perspect. Biol.* **5**, a012716. doi: 10.1101/cshperspect.a012716 (2013).
- 677 72. Saxena, S. & Zou, L. Hallmarks of DNA replication stress. *Mol. Cell* **82**, 2298-2314 (2022).
- 678 73. Paull, T. T. Mechanisms of ATM Activation. *Annu. Rev. Biochem.* **84**, 711-738 (2015).
- 679 74. Lee, J. & Paull, T. T. Activation and regulation of ATM kinase activity in response to DNA  
680 double-strand breaks. *Oncogene* **26**, 7741-7748 (2007).
- 681 75. Huang, Y. *et al.* DNAJA2 deficiency activates cGAS-STING pathway via the induction of  
682 aberrant mitosis and chromosome instability. *Nat. Commun.* **14**, 5246-0 (2023).
- 683 76. Brown, A. D. *et al.* ATR suppresses endogenous DNA damage and allows completion of  
684 homologous recombination repair. *PLoS One* **9**, e91222 (2014).

- 685 77. McIntyre, R. E. *et al.* Disruption of mouse Cenpj, a regulator of centriole biogenesis,  
686 phenocopies Seckel syndrome. *PLoS Genet.* **8**, e1003022 (2012).
- 687 78. Nagai-Singer, M. A., Morrison, H. A. & Allen, I. C. NLRX1 Is a Multifaceted and Enigmatic  
688 Regulator of Immune System Function. *Front. Immunol.* **10**, 2419 (2019).
- 689 79. Chen, L., Cao, S., Lin, Z., He, S. & Zuo, J. NOD-like receptors in autoimmune diseases.  
690 *Acta Pharmacol. Sin.* **42**, 1742-1756 (2021).
- 691 80. Liu, M. *et al.* The regulatory role of NLRX1 in innate immunity and human disease. *Cytokine*  
692 **160**, 156055 (2022).
- 693 81. Chu, X., Wu, S. & Raju, R. NLRX1 Regulation Following Acute Mitochondrial Injury. *Front.*  
694 *Immunol.* **10**, 2431 (2019).
- 695 82. Leriche, M. *et al.* 53BP1 interacts with the RNA primer from Okazaki fragments to support  
696 their processing during unperturbed DNA replication. *Cell. Rep.* **42**, 113412 (2023).
- 697 83. Arnould, C. *et al.* Chromatin compartmentalization regulates the response to DNA damage.  
698 *Nature* **623**, 183-192 (2023).
- 699 84. Vincendeau, E. *et al.* SHLD1 is dispensable for 53BP1-dependent V(D)J recombination but  
700 critical for productive class switch recombination. *Nat. Commun.* **13**, 3707-3 (2022).
- 701 85. Honjoh, H. *et al.* MED1, a novel binding partner of BRCA1, regulates homologous  
702 recombination and R-loop processing. *Sci. Rep.* **12**, 17140-8 (2022).
- 703 86. Armstrong, D. L. *et al.* GWAS identifies novel SLE susceptibility genes and explains the  
704 association of the HLA region. *Genes Immun.* **15**, 347-354 (2014).
- 705 87. Adam, M. P., Hudgins, L. & Hannibal, M. in *GeneReviews*(®) (ed Adam, M. P. et al.)  
706 (University of Washington, Seattle. GeneReviews is a registered trademark of the University of  
707 Washington, Seattle. All rights reserved, Seattle (WA), 1993).
- 708 88. Dermawan, J. K. *et al.* Distinct genomic landscapes in radiation-associated angiosarcoma  
709 compared with other radiation-associated sarcoma histologies. *J. Pathol.* **260**, 465-477 (2023).
- 710 89. Zhurinsky, J. *et al.* Effects of the microtubule nucleator Mto1 on chromosomal movement,  
711 DNA repair, and sister chromatid cohesion in fission yeast. *Mol. Biol. Cell* **30**, 2695-2708 (2019).
- 712 90. Zhou, C. *et al.* Clinical and genetic analysis of combined oxidative phosphorylation  
713 deficiency-10 caused by MTO1 mutation. *Clin. Chim. Acta* **526**, 74-80 (2022).
- 714 91. Mushtaq Hashim Al-Bdere, N., Faaz Nassir Al-Saad, N., Jawad Al-Imari, M., Mudhafer  
715 Habbeeb, S. & Mizal Azoz, A. Genetic Polymorphisms of NOD2 and ATG16L1 in Different Types  
716 of Digestive Tract Inflammation. *Arch. Razi Inst.* **78**, 493-498 (2023).

- 717 92. Vohhodina, J. *et al.* The RNA processing factors THRAP3 and BCLAF1 promote the DNA  
718 damage response through selective mRNA splicing and nuclear export. *Nucleic Acids Res.* **45**,  
719 12816-12833 (2017).
- 720 93. Beli, P. *et al.* Proteomic investigations reveal a role for RNA processing factor THRAP3 in  
721 the DNA damage response. *Mol. Cell* **46**, 212-225 (2012).
- 722 94. Kumari, N., Antil, H., Kumari, S. & Raghavan, S. C. Deficiency of ligase IV leads to reduced  
723 NHEJ, accumulation of DNA damage, and can sensitize cells to cancer therapeutics. *Genomics*  
724 **115**, 110731 (2023).
- 725 95. Jauch, A. J. *et al.* Autoimmunity and immunodeficiency associated with monoallelic LIG4  
726 mutations via haploinsufficiency. *J. Allergy Clin. Immunol.* **152**, 500-516 (2023).
- 727 96. Yilmaz Demirdag, Y. & Gupta, S. Infections in DNA Repair Defects. *Pathogens* **12**, 440. doi:  
728 10.3390/pathogens12030440 (2023).
- 729 97. Ramirez, N. *et al.* Multi-omics analysis of naïve B cells of patients harboring the C104R  
730 mutation in TACI. *Front. Immunol.* **13**, 938240 (2022).
- 731 98. Kakkas, I. *et al.* TACI Mutations in Primary Antibody Deficiencies: A Nationwide Study in  
732 Greece. *Medicina (Kaunas)* **57**, 827. doi: 10.3390/medicina57080827 (2021).
- 733 99. de Valles-Ibáñez, G. *et al.* Evaluating the Genetics of Common Variable Immunodeficiency:  
734 Monogenetic Model and Beyond. *Front. Immunol.* **9**, 636 (2018).
- 735 100. Nomani, H. *et al.* Implications of combined NOD2 and other gene mutations in  
736 autoinflammatory diseases. *Front. Immunol.* **14**, 1265404 (2023).
- 737 101. Karamanakos, A. *et al.* Autoinflammatory syndromes with coexisting variants in  
738 Mediterranean FeVer and other genes: Utility of multiple gene screening and the possible  
739 impact of gene dosage. *Semin. Arthritis Rheum.* **56**, 152055 (2022).
- 740 102. Wouters, F., Bogie, J., Wullaert, A. & van der Hilst, J. Recent Insights in Pyrin  
741 Inflammasome Activation: Identifying Potential Novel Therapeutic Approaches in Pyrin-  
742 Associated Autoinflammatory Syndromes. *J. Clin. Immunol.* **44**, 8-5 (2023).
- 743 103. Nomani, H. *et al.* Implications of combined NOD2 and other gene mutations in  
744 autoinflammatory diseases. *Front. Immunol.* **14**, 1265404 (2023).
- 745 104. Hao, Q., Lu, H. & Zhou, X. A potential synthetic lethal strategy with PARP inhibitors:  
746 perspective on 'Inactivation of the tumor suppressor p53 by long noncoding RNA RMRP'. *J. Mol.*  
747 *Cell. Biol.* **13**, 690-692 (2021).
- 748 105. Huang, R. *et al.* The p53/RMRP/miR122 signaling loop promotes epithelial-mesenchymal  
749 transition during the development of silica-induced lung fibrosis by activating the notch pathway.  
750 *Chemosphere* **263**, 128133 (2021).

- 751 106. Wolf, C. *et al.* UNC93B1 variants underlie TLR7-dependent autoimmunity. *Sci. Immunol.*,  
752 eadi9769 (2024).
- 753 107. He, Z., Ye, S., Xing, Y., Jiu, Y. & Zhong, J. UNC93B1 curbs cytosolic DNA signaling by  
754 promoting STING degradation. *Eur. J. Immunol.* **51**, 1672-1685 (2021).
- 755 108. Zhu, H., Zhang, R., Yi, L., Tang, Y. & Zheng, C. UNC93B1 attenuates the cGAS-STING  
756 signaling pathway by targeting STING for autophagy-lysosome degradation. *J. Med. Virol.* **94**,  
757 4490-4501 (2022).
- 758 109. Ciężyńska, M. *et al.* The Role of NLRP1, NLRP3, and AIM2 Inflammasomes in Psoriasis:  
759 Review. *Int. J. Mol. Sci.* **22**, 5898. doi: 10.3390/ijms22115898 (2021).
- 760 110. Docherty, C. A. *et al.* A novel dual NLRP1 and NLRP3 inflammasome inhibitor for the  
761 treatment of inflammatory diseases. *Clin. Transl. Immunology* **12**, e1455 (2023).
- 762 111. Miyashita, Y. *et al.* TICAM-1/TRIF associates with Act1 and suppresses IL-17 receptor-  
763 mediated inflammatory responses. *Life. Sci. Alliance* **5**, e202101181. doi:  
764 10.26508/lsa.202101181. Print 2022 Feb (2021).
- 765 112. Jensen, L. T., Attfield, K. E., Feldmann, M. & Fugger, L. Allosteric TYK2 inhibition:  
766 redefining autoimmune disease therapy beyond JAK1-3 inhibitors. *EBioMedicine* **97**, 104840  
767 (2023).
- 768 113. Gevezova, M. *et al.* Autistic spectrum disorder (ASD) - Gene, molecular and pathway  
769 signatures linking systemic inflammation, mitochondrial dysfunction, transsynaptic signalling,  
770 and neurodevelopment. *Brain Behav. Immun. Health.* **30**, 100646 (2023).
- 771 114. Pollina, E. A. *et al.* A NPAS4-NuA4 complex couples synaptic activity to DNA repair.  
772 *Nature* **614**, 732-741 (2023).
- 773 115. Zhou, X. *et al.* Integrating de novo and inherited variants in 42,607 autism cases identifies  
774 mutations in new moderate-risk genes. *Nat. Genet.* **54**, 1305-1319 (2022).
- 775 116. Wilfert, A. B. *et al.* Recent ultra-rare inherited variants implicate new autism candidate risk  
776 genes. *Nat. Genet.* **53**, 1125-1134 (2021).
- 777 117. Fu, J. M. *et al.* Rare coding variation provides insight into the genetic architecture and  
778 phenotypic context of autism. *Nat. Genet.* **54**, 1320-1331 (2022).
- 779 118. Mueller, F. S. *et al.* Deficient DNA base-excision repair in the forebrain leads to a sex-  
780 specific anxiety-like phenotype in mice. *BMC Biol.* **20**, 170-1 (2022).
- 781 119. Shen, X. *et al.* The role of Gadd45b in neurologic and neuropsychiatric disorders: An  
782 overview. *Front. Mol. Neurosci.* **15**, 1021207 (2022).
- 783 120. Dileep, V. *et al.* Neuronal DNA double-strand breaks lead to genome structural variations  
784 and 3D genome disruption in neurodegeneration. *Cell* **186**, 4404-4421.e20 (2023).



- 785 121. Yang, C. *et al.* Expression signature of inflammation-associated long non-coding RNAs in  
786 adult-onset Still's disease. *Clin. Exp. Rheumatol.* **39 Suppl 132**, 67-74 (2021).
- 787 122. Jaber, S., Toufektchan, E., Lejour, V., Bardot, B. & Toledo, F. p53 downregulates the  
788 Fanconi anaemia DNA repair pathway. *Nat. Commun.* **7**, 11091 (2016).
- 789 123. Rakotopare, J. & Toledo, F. p53 in the Molecular Circuitry of Bone Marrow Failure  
790 Syndromes. *Int. J. Mol. Sci.* **24**, 14940. doi: 10.3390/ijms241914940 (2023).
- 791 124. Parvin, S. *et al.* ATM depletion induces proteasomal degradation of FANCD2 and  
792 sensitizes neuroblastoma cells to PARP inhibitors. *BMC Cancer* **23**, 313-y (2023).
- 793 125. Ishiai, M. Regulation of the Fanconi Anemia DNA Repair Pathway by Phosphorylation and  
794 Monoubiquitination. *Genes (Basel)* **12**, 1763. doi: 10.3390/genes12111763 (2021).
- 795 126. Tammimies, K. Genetic mechanisms of regression in autism spectrum disorder. *Neurosci.*  
796 *Biobehav. Rev.* **102**, 208-220 (2019).
- 797 127. Golla, S. & Sweeney, J. A. Corticosteroid therapy in regressive autism: Preliminary findings  
798 from a retrospective study. *BMC Med.* **12**, 79-79 (2014).
- 799 128. Rossignol, D. A. & Frye, R. E. A Systematic Review and Meta-Analysis of Immunoglobulin  
800 G Abnormalities and the Therapeutic Use of Intravenous Immunoglobulins (IVIG) in Autism  
801 Spectrum Disorder. *J. Pers. Med.* **11**, 488. doi: 10.3390/jpm11060488 (2021).
- 802 129. Hopfner, K. & Hornung, V. Molecular mechanisms and cellular functions of cGAS-STING  
803 signalling. *Nat. Rev. Mol. Cell Biol.* **21**, 501-521 (2020).
- 804 130. Phelan, T., Little, M. A. & Brady, G. Targeting of the cGAS-STING system by DNA viruses.  
805 *Biochem. Pharmacol.* **174**, 113831 (2020).
- 806 131. Fan, Y. M., Zhang, Y. L., Luo, H. & Mohamud, Y. Crosstalk between RNA viruses and DNA  
807 sensors: Role of the cGAS-STING signalling pathway. *Rev. Med. Virol.* **32**, e2343 (2022).
- 808 132. Wang, C. *et al.* Ultrasound-responsive low-dose doxorubicin liposomes trigger  
809 mitochondrial DNA release and activate cGAS-STING-mediated antitumour immunity. *Nat.*  
810 *Commun.* **14**, 3877-x (2023).
- 811 133. Kim, J., Kim, H. & Chung, J. H. Molecular mechanisms of mitochondrial DNA release and  
812 activation of the cGAS-STING pathway. *Exp. Mol. Med.* **55**, 510-519 (2023).
- 813 134. West, A. P. *et al.* Mitochondrial DNA stress primes the antiviral innate immune response.  
814 *Nature* **520**, 553-557 (2015).
- 815 135. Lammert, C. R. *et al.* AIM2 inflammasome surveillance of DNA damage shapes  
816 neurodevelopment. *Nature* **580**, 647-652 (2020).
- 817 136. Dawson, R. E. *et al.* The cytosolic DNA sensor AIM2 promotes Helicobacter-induced  
818 gastric pathology via the inflammasome. *Immunol. Cell Biol.* **101**, 444-457 (2023).

- 819 137. Vinuesa, C. G., Grenov, A. & Kassiotis, G. Innate virus-sensing pathways in B cell  
820 systemic autoimmunity. *Science* **380**, 478-484 (2023).
- 821 138. Hu, Y. *et al.* Emerging role of the cGAS-STING signaling pathway in autoimmune  
822 diseases: Biologic function, mechanisms and clinical prospection. *Autoimmun. Rev.* **21**, 103155  
823 (2022).
- 824 139. Kivanc, D. & Dasdemir, S. The relationship between defects in DNA repair genes and  
825 autoinflammatory diseases. *Rheumatol. Int.* **42**, 1-13 (2022).
- 826 140. Miner, J. J. & Fitzgerald, K. A. A path towards personalized medicine for autoinflammatory  
827 and related diseases. *Nat. Rev. Rheumatol.* **19**, 182-189 (2023).
- 828 141. Li, R. *et al.* cGAS/STING signaling in the regulation of rheumatoid synovial aggression.  
829 *Ann. Transl. Med.* **10**, 431-4533 (2022).
- 830 142. Hagiwara, A. M., Moore, R. E., Wallace, D. J., Ishimori, M. & Jefferies, C. A. Regulation of  
831 cGAS-STING Pathway - Implications for Systemic Lupus Erythematosus. *Rheumatol. Immunol.*  
832 *Res.* **2**, 173-184 (2021).
- 833 143. Wobma, H., Shin, D. S., Chou, J. & Dedeoğlu, F. Dysregulation of the cGAS-STING  
834 Pathway in Monogenic Autoinflammation and Lupus. *Front. Immunol.* **13**, 905109 (2022).
- 835 144. Iourov, I. Y. *et al.* Causes and Consequences of Genome Instability in Psychiatric and  
836 Neurodegenerative Diseases. *Mol. Biol. (Mosk)* **55**, 42-53 (2021).
- 837 145. Loncharich, M. F. & Anderson, C. W. Interferon Inhibition for Lupus with Anifrolumab:  
838 Critical Appraisal of the Evidence Leading to FDA Approval. *ACR Open Rheumatol.* **4**, 486-491  
839 (2022).
- 840 146. Weckerle, C. E. *et al.* Network analysis of associations between serum interferon- $\alpha$  activity,  
841 autoantibodies, and clinical features in systemic lupus erythematosus. *Arthritis Rheum.* **63**,  
842 1044-1053 (2011).
- 843 147. Nikolaidou, A., Beis, I., Dragoumi, P. & Zafeiriou, D. Neuropsychiatric manifestations  
844 associated with Juvenile Systemic Lupus Erythematosus: An overview focusing on early  
845 diagnosis. *Brain Dev.* (2023).
- 846 148. Van der Heijden, H. *et al.* Implications of Inflammatory Processes on a Developing Central  
847 Nervous System in Childhood-onset Systemic Lupus Erythematosus. *Arthritis Rheumatol.*  
848 (2023).
- 849 149. Ferecskó, A. S. *et al.* STING-Triggered CNS Inflammation in Human Neurodegenerative  
850 Diseases. *Biomedicines* **11**, 1375. doi: 10.3390/biomedicines11051375 (2023).
- 851 150. Gulen, M. F. *et al.* cGAS-STING drives ageing-related inflammation and  
852 neurodegeneration. *Nature* **620**, 374-380 (2023).

- 853 151. Chen, K. *et al.* cGAS-STING-mediated IFN-I Response in Host Defense and  
854 Neuroinflammatory Diseases. *Curr. Neuropharmacol.* **20**, 362-371 (2022).
- 855 152. Beesetti, S. *et al.* FANCL supports Parkin-mediated mitophagy in a ubiquitin ligase-  
856 independent manner. *Biochim. Biophys. Acta Mol. Basis Dis.* **1868**, 166453 (2022).
- 857 153. Luzwick, J. W. *et al.* MRE11-dependent instability in mitochondrial DNA fork protection  
858 activates a cGAS immune signaling pathway. *Sci. Adv.* **7**, eabf9441 (2021).
- 859 154. Habibi, P. *et al.* Effect of heat stress on DNA damage: a systematic literature review. *Int. J.*  
860 *Biometeorol.* **66**, 2147-2158 (2022).
- 861 155. Couillin, I. & Riteau, N. STING Signaling and Sterile Inflammation. *Front. Immunol.* **12**,  
862 753789 (2021).
- 863 156. Yang, J. *et al.* STING in tumors: a focus on non-innate immune pathways. *Front. Cell. Dev.*  
864 *Biol.* **11**, 1278461 (2023).
- 865 157. He, X. *et al.* IUPHAR ECR review: The cGAS-STING pathway: novel functions beyond  
866 innate immune and emerging therapeutic opportunities. *Pharmacol. Res.*, 107063 (2024).
- 867 158. Xun, J. *et al.* A conserved ion channel function of STING mediates noncanonical  
868 autophagy and cell death. *EMBO Rep.* (2024).

869

## 870 **Acknowledgments**

871 H.M.L. is supported by the National Institute of Child Health and Human Development  
872 NIH/NICHD; P30 HD071593 to the Albert Einstein College of Medicine's Rose F. Kennedy  
873 Intellectual and Developmental Disabilities Research Center, and the National Institute of  
874 Mental Health, R21MH131740. The Lachman lab also receives support from the Janice C.  
875 Blanchard Family Fund and the iPS Cell Research for Ryan Stearn Fund. This work was funded  
876 by grants to the J.L.C Swedish Research Council (Grant No. 2019-06082). P.J. van der Spek is  
877 supported by EU H2020 grants, an ImmunAID grant (ID: 7792950), and a  
878 MOODSTRATIFICATION grant (ID: 754740). The Bioinformatics infrastructure and team are  
879 supported by grants from KWF, NWO/ZonMW, and the Dutch Heart Foundation through the  
880 BDVA-initiated H2020 Bigmedilytics program on Personalized Medicine. Janet Cunningham is a  
881 Gullstrand Fellow at Uppsala University Hospital. Jennifer Frankovich's research is supported  
882 by several foundations including the Neuroimmune Foundation, Lucile Packard Foundation for  
883 Children's Health, the Dollinger Biomarker Core, Stanford Spark, and collaborations on NIH  
884 grants. Funders had no role in study design, data collection and analysis, decision to publish, or  
885 preparation of the manuscript. We thank the Albert Einstein College of Medicine Epigenomics

886 Shared Core Facility RRID: SCR\_023284 for Library preparation, QC, and sequencing, and  
887 Yongmei Zhao for technical assistance with the library preps. The authors want to thank the  
888 participating families.

889

### 890 **Author contributions**

891 J.L.C. co-wrote the paper, and was involved in the study concept and design; J.F. contributed  
892 cases, provided genetic data for case 16, and co-wrote the manuscript); R,A.B. carried out  
893 WES on case 10); E.P. processed DNA, validated variants, edited manuscript, created figures  
894 1,3; R.F.A. validated variants; N.C.S. contributed case 16; S.B.M. made the WES library for  
895 case 10; H.D. involved in study concept; J.M. validated variants); J.E. validated variants; J.M.S.  
896 validated variants carried out Alphasense analysis; G.L. contributed case 1, edited  
897 manuscript); S.M.A.S. bioinformatics of variants, created Figure 4; S.S. edited manuscript;  
898 P.J.S. study concept and design, bioinformatics; H.M.L.co-wrote paper, study concept and  
899 design, analyzed variants, confirmed diagnoses, supervised study. All authors reviewed the  
900 manuscript.

901

### 902 **Data availability statement**

903 Variants reported in this paper will be submitted to ClinVar. WES data on case 10 will be made  
904 available at GenBank ®

905

### 906 **Competing interests**

907 J.L.C. has received lecturing fees from Otsuka Pharma Scandinavia, Janssen-Cilag AB and H.  
908 Lundbeck AB.

909

### 910 **Figure Legends**

911 **Figure 1. p53 DNA repair pathway.** A simplified depiction showing the regulation of p53 tumor  
912 suppressor activity by phosphorylation triggered by ATM, ATR, CHK1, and CHK2 kinases, and  
913 dephosphorylation by PPM1D. P53 activation can induce apoptosis or cell cycle arrest, which  
914 will eliminate DNA-damaged cells or provide an opportunity to repair the damage, respectively.  
915 Loss of function mutations in *ATM* or gain of function mutations in *PPM1D*, such as those found  
916 in patients with acute neuropsychiatric decompensation in cases 1-7, would be expected to lead  
917 to a decrease in p53 activity.

918 **Figure 2. Fanconi Core Complex.** The Fanconi Core Complex of proteins repairs interstrand  
919 crosslink breaks (Figure adapted from reference 49). The letters are abbreviations for the

920 Fanconi complex proteins (i.e., “A” is FANCA; “E” is FANCE, etc.). Monoubiquitinated (Ub)  
921 FANCD2 and FANCI form a dimer that binds to crosslink repair sites, which leads to the  
922 recruitment of nucleases that repair the DNA lesion (reference 53). All of the Fanconi complex  
923 genes described in this paper are depicted in bold type (FANCE, SLX4, FANCE, and FANCA).  
924 Interactions between Fanconi proteins with ATM/ATR are shown. The image was generated  
925 using biorender <https://www.biorender.com/>).

926 **Figure 3. Protein-Protein Interaction Network: STRING.** A connectivity network was  
927 generated for the candidate genes using IPA software. Central to the network are ATM and p53.  
928 Genes described in the paper that do not fit into the connectivity network are not shown (C7,  
929 DBH, SLC13AS, SRPK3, NLRX1, MTO1, CACNA1H, CACNA1S, CLPB, AHNAK2). SLX4 =  
930 FANCA/SLX4, TP53=p53, and TP53BP1 = 53BP1.

### 931 **Supplementary Data**

932 **Supplementary Methods.** An expanded description of the methods and primers used for  
933 Sanger DNA sequencing.

934 **Supplementary Table.** Description of additional gene variants found upon whole exome  
935 sequencing or the analysis of gene panels.

936 **Supplementary Figure. RMRP secondary structures.** The RNAfold web server was used to  
937 predict secondary structures for wild-type and mutant (c. C126T) RMRP RNAs. Differences  
938 between the two, especially in the centroid secondary structures, are seen.

939

Phosphorylation →  
Dephosphorylation —|

medRxiv preprint doi: <https://doi.org/10.1101/2024.02.20.24302984>; this version posted February 23, 2024. The copyright holder for this preprint (which was not certified by peer review) is the author/funder, who has granted medRxiv a license to display the preprint in perpetuity. All rights reserved. No reuse allowed without permission.

DNA Damage ⚡

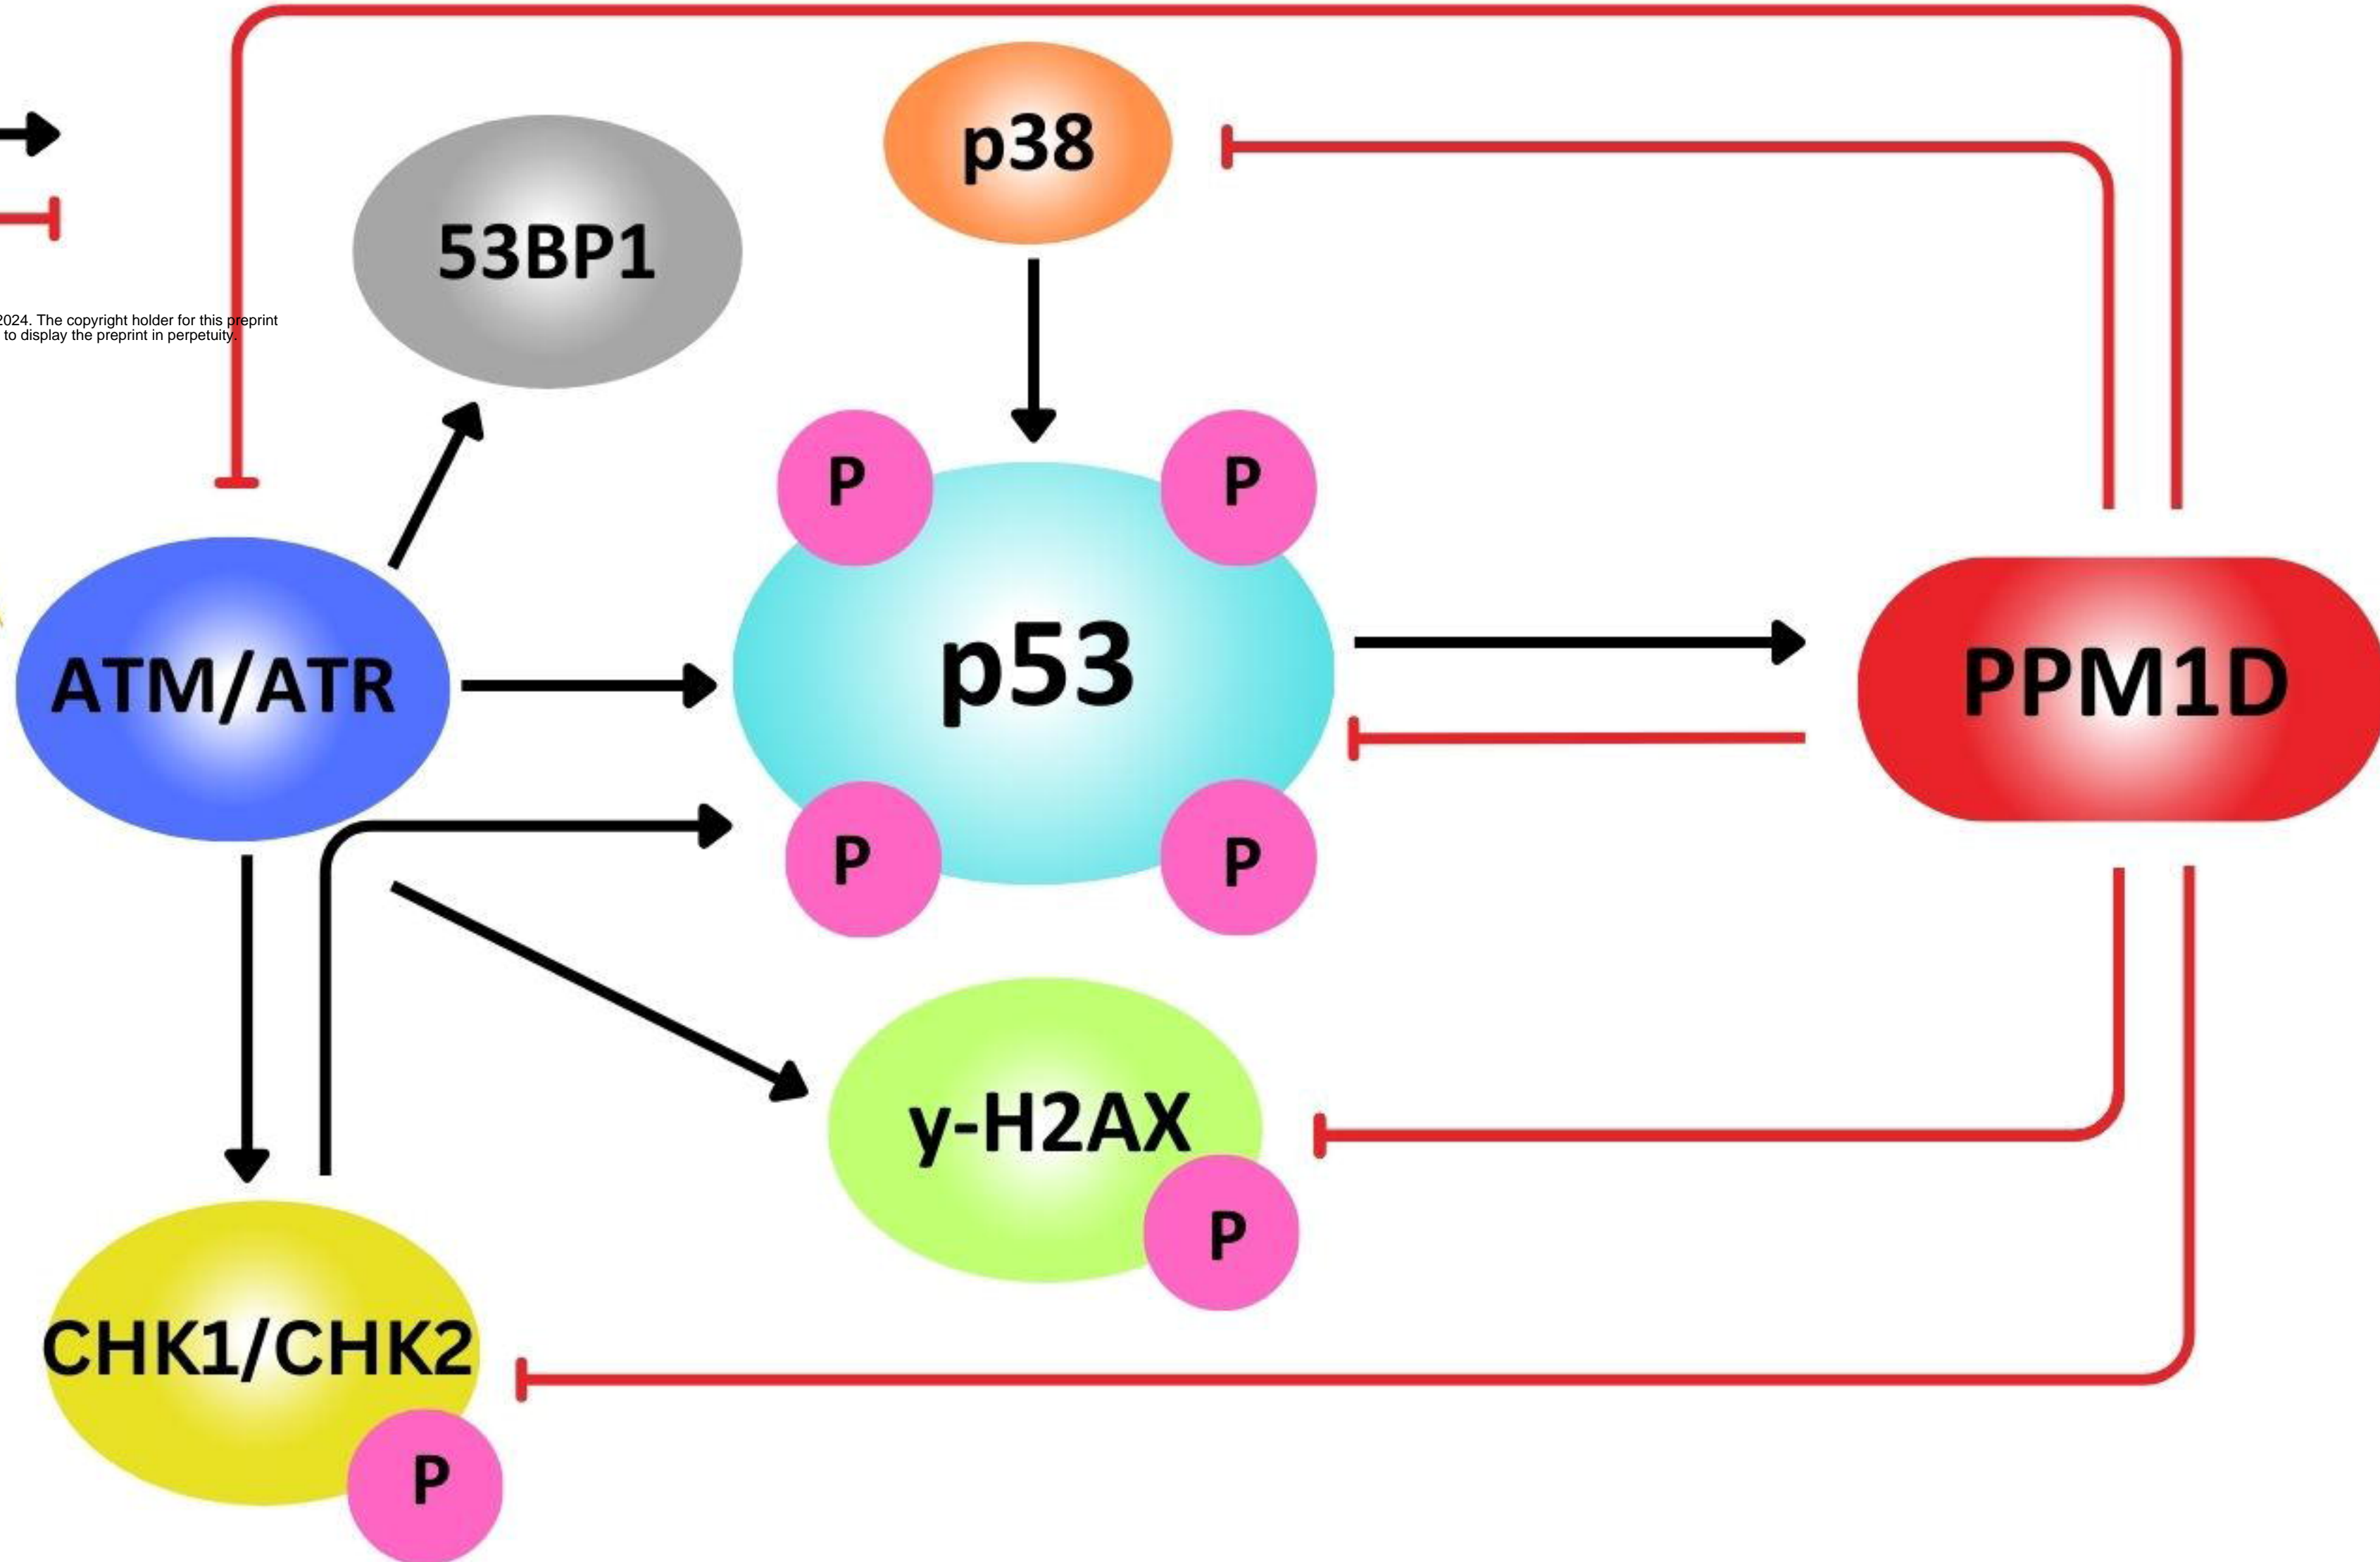

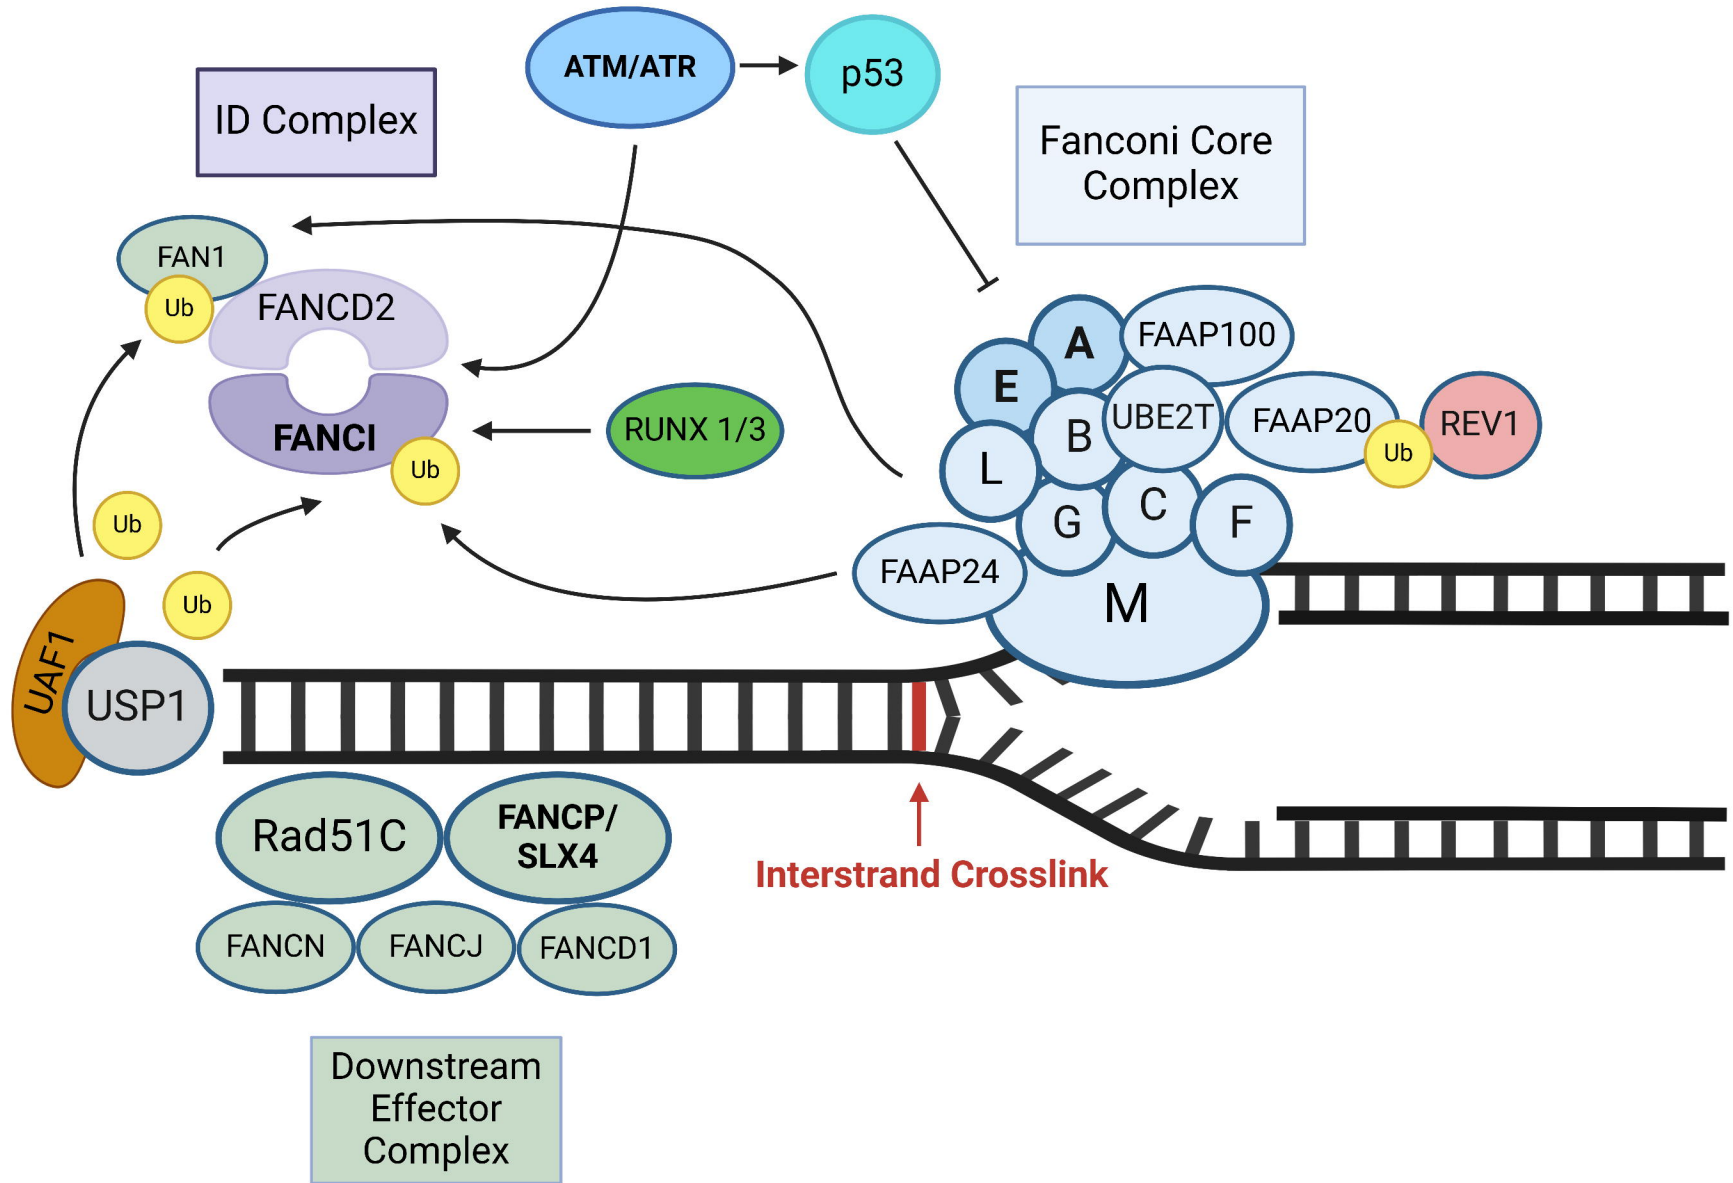

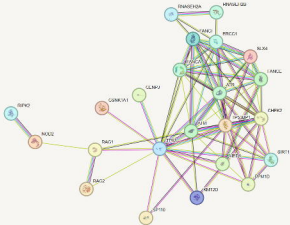



| Case | Family | Age*     | Gene  | Dx             | Variant                      | Type         | CADD  | ClinVar                      | AlphaMissense      | Inheritance | MAF     | Map position hg38         | rs number   | Additional rare and ultrarare variants | Genome sequencing                                        | validation |
|------|--------|----------|-------|----------------|------------------------------|--------------|-------|------------------------------|--------------------|-------------|---------|---------------------------|-------------|----------------------------------------|----------------------------------------------------------|------------|
| 1    | N/A    | 16-20    | PPM1D | JdVS, AR, PANS | c.1535delA, p.Asn5126Kfs     | frameshift   | N/A   | pathogenic                   | N/A                | de novo     | 0.00002 | chr17:60663013            | rs763475304 | CSNK1a1, SRPB, SLC13A5, CACNA1S        | GeneDx (WES)                                             | yes        |
| 2    | N/A    | 6 to 10  | PPM1D | JdVS, AR       | c.15736G>T, p.Glu525Ter      | missense     | 39    | uncertain significance       | N/A                | de novo     | 7E-06   | chr17:60663307            | rs739930701 | none reported                          | NHS North West (NDD panel)                               | no         |
| 3    | N/A    | 11 to 15 | ATM   | PANS           | c.7517_7520del, p.Asp2506Pfs | frameshift   | N/A   | pathogenic                   | N/A                | parent      | 2E-06   | chr11:108343272-108343479 | rs87781905  | CACNA1H, AHNAK2                        | Baylor Genetics (WES)                                    | no         |
| 4    | 1      | 6 to 10  | ATM   | ASD, AR, PANS  | c.8418-5_8418-8delG TGA      | splice donor | N/A   | pathogenic                   | N/A                | parent      | 4E-06   | chr11:108343272-108343479 | rs730881295 | RNASEH2B, RAG2, C7, NOD2, SP110        | Invitae (Immunodeficiency Panel)                         | yes        |
| 5    | 1      | 11 to 15 | ATM   | ASD, AR, PANS  | c.8418-5_8418-8delG TGA      | splice donor | N/A   | pathogenic                   | N/A                | parent      | 4E-06   | chr11:108343272-108343479 | rs730881295 | RNASEH2B, RAG2, NOD2, [rs229640892]    | Sanger sequencing of case 4 variants                     | yes        |
| 6    | 1      | 6 to 10  | ATM   | ASD, AR, PANS  | c.8418-5_8418-8delG TGA      | splice donor | N/A   | pathogenic                   | N/A                | parent      | 4E-06   | chr11:108343272-108343479 | rs730881295 | RNASEH2B, C7, NOD2, [rs229640892]      | GeneDx (WES)                                             | yes        |
| 7    | 1      | 6 to 10  | ATM   | ASD, AR, PANS  | c.8418-5_8418-8delG TGA      | splice donor | N/A   | pathogenic                   | N/A                | parent      | 4E-06   | chr11:108343272-108343479 | rs730881295 | RAG2, NOD2, [rs140716236], SP110       | Sanger sequencing of case 4 variants                     | yes        |
| 8    | 2      | 0-5      | ATR   | ASD, PANS AE   | c.2507A>T, p.Asp936Val       | missense     | 24    | not found                    | benign, 0.095      | parent      | unknown | chr3:142,553,850          | novel       | CENPI, NLRX1, DBH, CACNA1S, CLPB       | Invitae (Immunodeficiency Panel)                         | yes        |
| 9    | 2      | 0-5      | ATR   | ASD, PANS, AR  | c.2507A>T, p.Asp936Val       | missense     | 24    | not found                    | benign, 0.095      | parent      | unknown | chr3:142,553,850          | novel       | CENPI, NLRX1, DBH, CACNA1S, CLPB       | Courtagen Diagnostics Laboratory (WES)                   | yes        |
| 10   | N/A    | 0-5      | SBF1  | DD, AR, PANS   | c.6330T>C, p.Asp1103Tyr      | missense     | 21.7  | not found                    | benign, 0.1176     | unknown     | 0.00002 | chr15:83433462            | rs51138749  | MEI1, KMT2D, MTO1                      | Emory Genetics Sibling Registry (WES)                    | yes        |
| 11   | 3      | 0-5      | FANCF | CVID, PANS     | c.127G>A, p.Gly43Ser         | missense     | 23.1  | uncertain significance       | ambiguous, 0.4766  | parent      | unknown | chr6:35452572             | rs92819655  | VPS13B                                 | Invitae (Immunodeficiency Panel)                         | yes        |
| 12   | 3      | 0-5      | FANCF | CVID, DD, AE   | c.127G>A, p.Gly43Ser         | missense     | 23.1  | uncertain significance       | ambiguous, 0.4766  | parent      | unknown | chr6:35452572             | rs92819655  | VPS13B, THRAP3, NOD2                   | Invitae (Immunodeficiency Panel)                         | yes        |
| 13   | N/A    | 11 to 15 | FANCI | AE, PANS       | c.1461T>A, p.Tyr487Ter       | missense     | 37    | pathogenic/likely pathogenic | N/A                | unknown     | 0.00003 | chr15:89281149            | rs769248873 | FANCF/SLX4, LIG4                       | Invitae (Immunodeficiency Panel)                         | no         |
| 14   | 4      | 6 to 10  | FANCP | CVID, PANS, AE | c.2623 G>A, p.Glu875Lys      | missense     | 14.15 | not found                    | benign, 0.0771     | unknown     | 1.6E-05 | chr16:3590914             | rs924446221 | RMRP, MEV, TNFRSF13B, DOC2B            | Invitae (Immunodeficiency Panel)                         | no         |
| 15   | 4      | 6 to 10  | FANCP | CVID, AE       | c.2623 G>A, p.Glu875Lys      | missense     | 14.15 | not found                    | benign, 0.0771     | unknown     | 1.6E-05 | chr16:3590914             | rs924446221 | RMRP, MEV, TNFRSF13B, DOC2B            | Invitae (Immunodeficiency Panel)                         | no         |
| 16   | N/A    | 6 to 10  | FANCA | PANS           | c.1771C>G, p.Arg916Gly       | missense     | 21.9  | uncertain significance       | pathogenic, 0.6394 | unknown     | 0.00006 | chr16:39778848            | rs753980264 | UNC93B1, NLRP1, TICAM1, TYK2, TCN2     | Invitae (Immunodeficiency and Cellular Dyskinesia Panel) | no         |

**Table.** Description of all primary DNA repair variants. \*Age range at diagnosis; Dx: diagnosis (JdVS: Jansen de Vries Syndrome, AR: acute regression, PANS: pediatric acute-onset neuropsychiatric syndrome, AE: autoimmune encephalitis, DD: developmental delay, CVID: common variable immune deficiency); variant shows the cDNA and amino acid changes; type shows how the mutation affects gene function; CADD: Combined Annotation score; N/A not available. ClinVar is the predicted pathogenicity based on the ClinVar database; AlphaMissense is the predicted pathogenicity based on amino acid change (see main text); Inheritance pattern shows that the variant in question was either de novo or transmitted from a parent. The sex of the parent was omitted to maintain anonymity; MAF: Minor allele frequency; Map position shows coordinates of variants based on hg38 build; rs number is based on SNP database; Additional variants were found in each case (see Supplemental table for descriptions); Genome sequencing shows the genetic analysis that was carried out; validation by Sanger sequencing
