# Supplementary material for: Ultrarare Variants in DNA Damage Repair Genes in Pediatric Acute-Onset Neuropsychiatric Syndrome or Acute Behavioral Regression in Neurodevelopmental Disorders
Source: medRxiv preprint, doi:10.1101/2024.02.20.24302984, version 2 (2024-02-23)
Supplement: supplementary figure [file 302984_file08.docx]

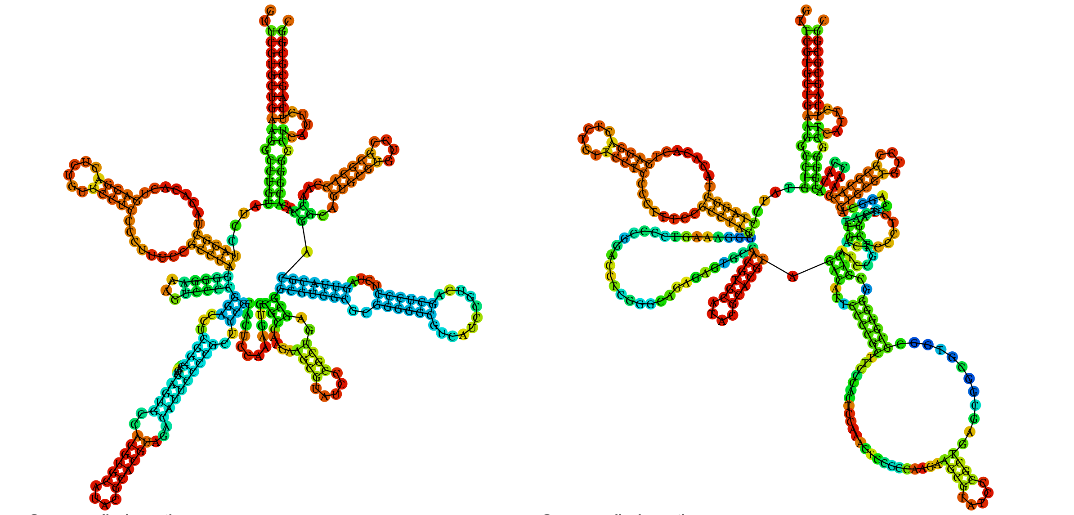


**Optimal secondary structure of wild-type RMRP, minimum free energy -101.30 kcal/mol.**

**Left: MFE secondary structure. Right: centroid secondary structure.**


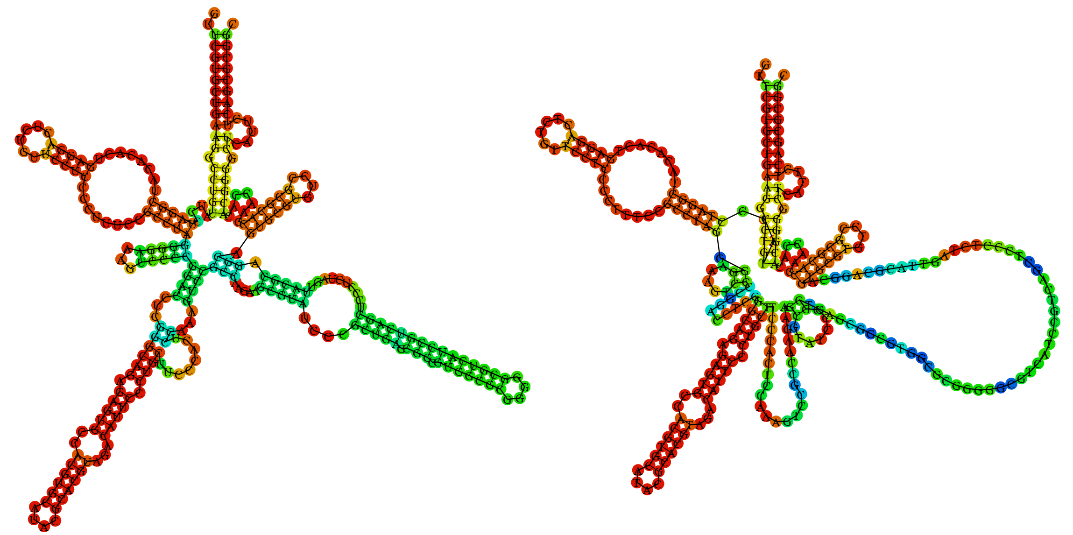


**Optimal secondary structure of mutant RMRP, minimum free energy -105.20 kcal/mol.**

**Left: MFE secondary structure. Right: centroid secondary structure**
